# Supplementary material for: The many forms of alpha-methoxy phenylacetic acid in the gas phase: flexibility, internal dynamics, and their intramolecular interactions
Source: Royal Society of Chemistry journal article supplement (doi:10.1039/d2cp03962a), 2022-01-01
Supplement: d2cp03962a1.pdf [file d2cp03962a1.pdf]

## List of Figures

|                                                                                                                                                                                                                                                                                                                                                                                                                                                                                                                                                                                                                                                                                             |    |
|---------------------------------------------------------------------------------------------------------------------------------------------------------------------------------------------------------------------------------------------------------------------------------------------------------------------------------------------------------------------------------------------------------------------------------------------------------------------------------------------------------------------------------------------------------------------------------------------------------------------------------------------------------------------------------------------|----|
| <b>Fig S1:</b> Molecular structure of AMPA with atom labelling and illustrating the three dihedral angles explored in this work, $\tau(C_{13}-C_{12}-C_7-C_8)$ , $\theta(O_{10}-C_8-C_7-O_{12})$ and $\varphi(H_{11}-O_{10}-C_8-C_7)$ .                                                                                                                                                                                                                                                                                                                                                                                                                                                     | 3  |
| <b>Fig S2:</b> The eight structures of AMPA optimized at the B3LYP-D3(BJ)/def2-TZVP level of theory along with their relative energies with and without zero-point energy (ZPE) correction in kJ/mol. The single-point energies obtained at DLPNO-CCSD/aug-cc-pVTZ level of theory along with single-point energies corrected with the zero-point energy term from the frequency calculations at the B3LYP-D3(BJ)/def2-TZVP level of theory are shown in red in the figure.                                                                                                                                                                                                                 | 4  |
| <b>Fig S3:</b> The eight structures of AMPA connected through <i>cis-trans</i> , in-out, and perp-par motions                                                                                                                                                                                                                                                                                                                                                                                                                                                                                                                                                                               | 5  |
| <b>Fig S4:</b> Scan of the potential energy curve for the dihedral angles $\varphi(H_{11}-O_{10}-C_8-C_7)$ and $\theta(O_{10}-C_8-C_7-O_{12})$ at the B3LYP-D3(BJ)/def2-TZVP level of theory using ORCA, for in-out and <i>cis-trans</i> motions of <i>cis</i> -in-perp. The position of the observed conformations is indicated in the plot and illustrated with the corresponding structure. See Figure S1 for atom labelling.                                                                                                                                                                                                                                                            | 6  |
| <b>Fig S5:</b> Scan of the potential energy curve for the dihedral angles $\theta(O_{10}-C_8-C_7-O_{12})$ , $\varphi(H_{11}-O_{10}-C_8-C_7)$ , and $\tau(C_{13}-O_{12}-C_7-C_8)$ at the B3LYP-D3(BJ)/def2-TZVP level of theory using ORCA, for <i>cis-trans</i> , in-out, and par-perp motions of <i>trans</i> -out-par. The position of the observed conformations is indicated in the plot and illustrated with the corresponding structure. See Figure S1 for atom labelling. A two-dimensional scan was also performed by scanning the $\tau$ and $\theta$ coordinates in steps of $10^\circ$ and $20^\circ$ respectively at the B3LYP-D3(BJ)/def2-TZVP level of theory using Gaussian. | 7  |
| <b>Fig S6:</b> Scan of the potential energy curve for the dihedral angles $\varphi(H_{11}-O_{10}-C_8-C_7)$ and $\theta(O_{10}-C_8-C_7-O_{12})$ at the B3LYP-D3(BJ)/def2-TZVP level of theory using ORCA for in-out and <i>cis-trans</i> motions of <i>cis</i> -in-par. The position of the observed conformations is indicated in the plot and illustrated with the corresponding structure. See Figure S1 for atom labelling.                                                                                                                                                                                                                                                              | 8  |
| <b>Fig S7:</b> Scan of the potential energy curve for the dihedral angles $\tau(C_{13}-O_{12}-C_7-C_8)$ at the B3LYP-D3(BJ)/def2-TZVP level of theory using ORCA for par-perp motion of <i>cis</i> -out-par. The position of the observed conformations is indicated in the plot and illustrated with the corresponding structure. See Figure S1 for atom labelling.                                                                                                                                                                                                                                                                                                                        | 9  |
| <b>Fig S8:</b> Scan of the potential energy curve for the dihedral angles $\theta(O_{10}-C_8-C_7-O_{12})$ and $\varphi(H_{11}-O_{10}-C_8-C_7)$ at the B3LYP-D3(BJ)/def2-TZVP level of theory using ORCA for <i>cis-trans</i> , in-out motions of <i>trans</i> -out-perp. The position of the observed conformations is indicated in the plot and illustrated with the corresponding structure. See Figure S1 for atom labelling.                                                                                                                                                                                                                                                            | 10 |
| <b>Fig S9:</b> Scan of the potential energy curve for the dihedral angle $\tau(C_{13}-O_{12}-C_7-C_8)$ at the B3LYP-D3(BJ)/def2-TZVP level of theory using ORCA for par-perp motion of <i>trans</i> -in-par. The position of the observed conformations is indicated in the plot and illustrated with the corresponding structure. See Figure S1 for atom labelling.                                                                                                                                                                                                                                                                                                                        | 11 |
| <b>Fig S10:</b> The orange, black, and maroon traces show portions of rotational spectra obtained with He, Ne, and Ar carrier gases. The lower traces (in color) represent simulations employing the fitted rotational parameters of different conformers of AMPA as given in Table 2 of the manuscript.                                                                                                                                                                                                                                                                                                                                                                                    | 12 |
| <b>Fig S11:</b> Relaxed potential energy scans B3LYP-D3(BJ)/def2-TZVP for the internal rotation of the OCH <sub>3</sub> rotor for the conformers <i>cis</i> -out-par, <i>trans</i> -out-perp, and <i>cis</i> -out-perp. The experimental barrier for those three conformers could not be fitted.                                                                                                                                                                                                                                                                                                                                                                                            | 13 |

## List of Tables

|                                                                                                                                                                                                                                                                                                                                                                |    |
|----------------------------------------------------------------------------------------------------------------------------------------------------------------------------------------------------------------------------------------------------------------------------------------------------------------------------------------------------------------|----|
| <b>Table S1:</b> Dihedral angles for three motions of eight conformers of AMPA calculated at the B3LYP-D3(BJ)/def2-TZVP level of theory                                                                                                                                                                                                                        | 14 |
| <b>Table S2:</b> Experimental rotational parameters obtained for the <sup>13</sup> C isotopologues of the lowest energy conformer <i>cis</i> -in-perp obtained using SPFIT.                                                                                                                                                                                    | 14 |
| <b>Table S3:</b> Experimental rotational parameters obtained using XIAM for the conformers <i>cis</i> -in-perp and <i>trans</i> -out-par.                                                                                                                                                                                                                      | 15 |
| <b>Table S4:</b> Experimentally determined bond distances, bond angles, and dihedral angles of conformer <i>cis</i> -in-perp determined using effective structure $r_0$ , and substitution structure $r_s$ -method in comparison with the equilibrium $r_e$ -values obtained from quantum-chemical calculations at the B3LYP-D3(BJ)/def2-TZVP level of theory. | 15 |
| <b>Table S5:</b> Line list for the fit obtained using SPFIT program for <i>cis</i> -in-perp conformer, measured rotational transitions are shown as Obs. and the residuals are shown as Diff.                                                                                                                                                                  | 18 |
| <b>Table S6:</b> Line list for the fit obtained using SPFIT program for <i>trans</i> -out-par conformer, measured rotational transitions are shown as Obs. and the residuals are shown as Diff.                                                                                                                                                                | 22 |
| <b>Table S7:</b> Line list for the fit obtained using SPFIT program for <i>cis</i> -out-par conformer, measured rotational transitions are shown as Obs. and the residuals are shown as Diff.                                                                                                                                                                  | 25 |

|                                                                                                                                                                                                           |    |
|-----------------------------------------------------------------------------------------------------------------------------------------------------------------------------------------------------------|----|
| <b>Table S8:</b> Line list for the fit obtained using the SPFIT program for <i>trans</i> -out-perp conformer, measured rotational transitions are shown as Obs. and the residuals are shown as Diff. .... | 28 |
| <b>Table S9:</b> Line list for the fit obtained using SPFIT program for <i>cis</i> -out-perp conformer, measured rotational transitions are shown as Obs. and the residuals are shown as Diff. ....       | 28 |
| <b>Table S10:</b> Line list for the fit obtained using the XIAM program for <i>cis</i> -in-perp conformer, measured rotational transitions are shown as Obs. and the residuals are shown as Diff. ....    | 29 |
| <b>Table S11:</b> Line list for the fit obtained using the XIAM program for <i>trans</i> -out-perp conformer, measured rotational transitions are shown as Obs. and the residuals are shown as Diff. .... | 36 |

**Fig S1:** Molecular structure of AMPA with atom labelling and illustrating the three dihedral angles explored in this work,  $\tau(\text{C}_{13}\text{-O}_{12}\text{-C}_7\text{-C}_8)$ ,  $\theta(\text{O}_{10}\text{-C}_8\text{-C}_7\text{-O}_{12})$  and  $\varphi(\text{H}_{11}\text{-O}_{10}\text{-C}_8\text{-C}_7)$ .

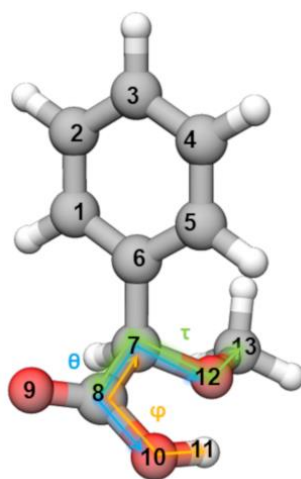

**Fig S2:** The eight structures of AMPA optimized at the B3LYP-D3(BJ)/def2-TZVP level of theory along with their relative energies with and without zero-point energy (ZPE) correction in kJ/mol. The single-point energies obtained at DLPNO-CCSD/aug-cc-pVTZ level of theory along with single-point energies corrected with the zero-point energy term from the frequency calculations at the B3LYP-D3(BJ)/def2-TZVP level of theory are shown in red in the figure.

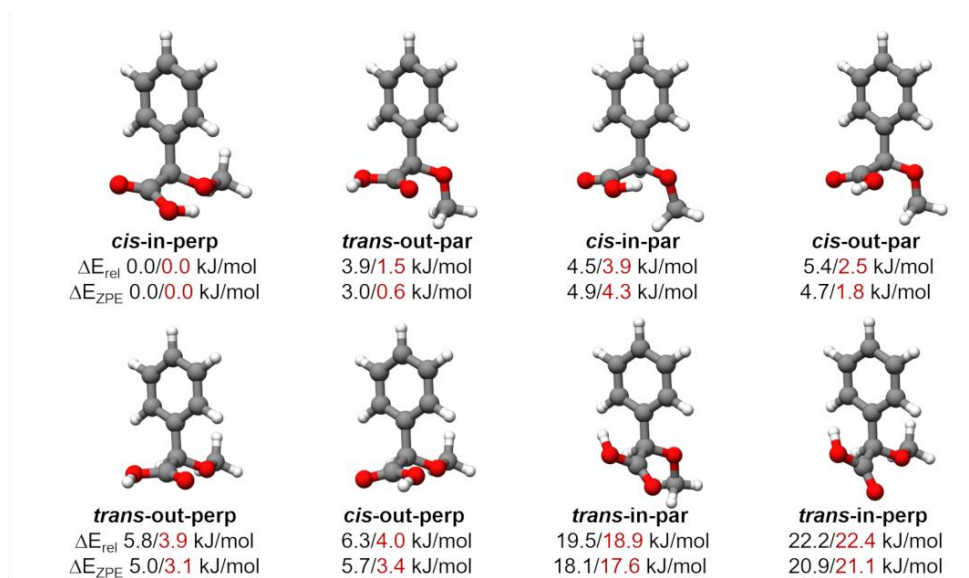



**Fig S4:** Scan of the potential energy curve for the dihedral angles  $\varphi(\text{H}_{11}\text{-O}_{10}\text{-C}_8\text{-C}_7)$  and  $\theta(\text{O}_{10}\text{-C}_8\text{-C}_7\text{-O}_{12})$  at the B3LYP-D3(BJ)/def2-TZVP level of theory using ORCA, for in-out and *cis-trans* motions of *cis-in-perp*. The position of the observed conformations is indicated in the plot and illustrated with the corresponding structure. See Figure S1 for atom labelling.

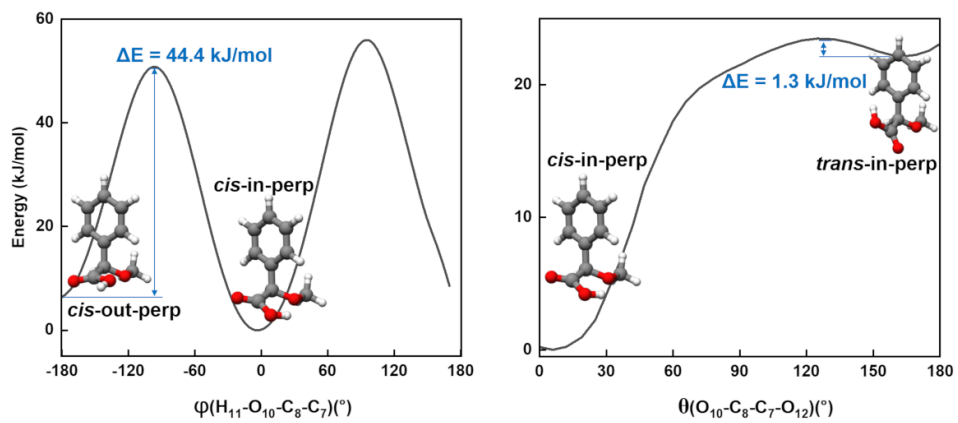

**Fig S5:** Scan of the potential energy curve for the dihedral angles  $\theta(O_{10}-C_8-C_7-O_{12})$ ,  $\varphi(H_{11}-O_{10}-C_8-C_7)$ , and  $\tau(C_{13}-O_{12}-C_7-C_8)$  at the B3LYP-D3(BJ)/def2-TZVP level of theory using ORCA, for *cis-trans*, in-out, and par-perp motions of *trans-out-par*. The position of the observed conformations is indicated in the plot and illustrated with the corresponding structure. See Figure S1 for atom labelling. A two-dimensional scan was also performed by scanning the  $\tau$  and  $\theta$  coordinates in steps of  $10^\circ$  and  $20^\circ$  respectively at the B3LYP-D3(BJ)/def2-TZVP level of theory using Gaussian.

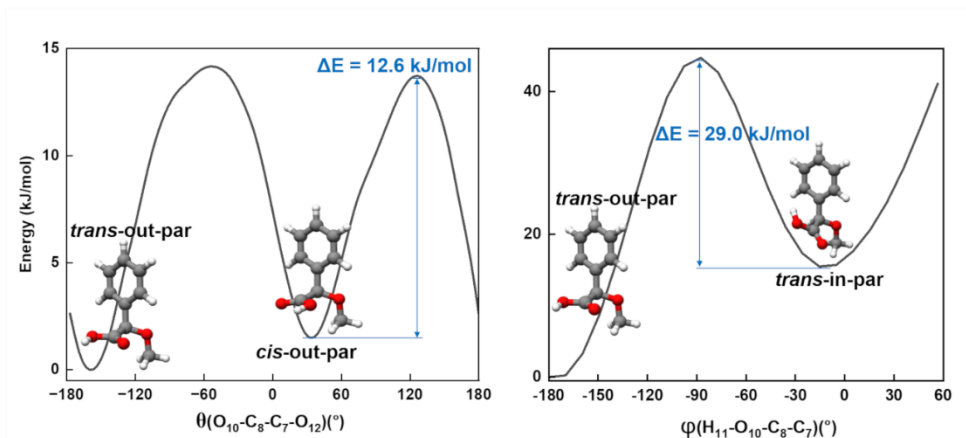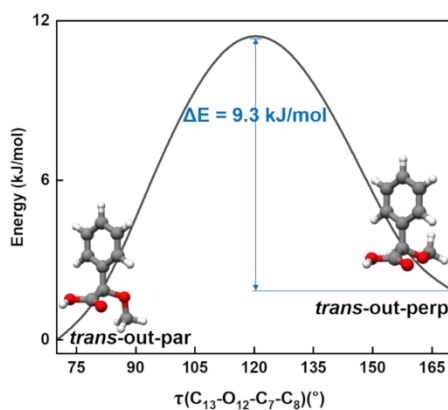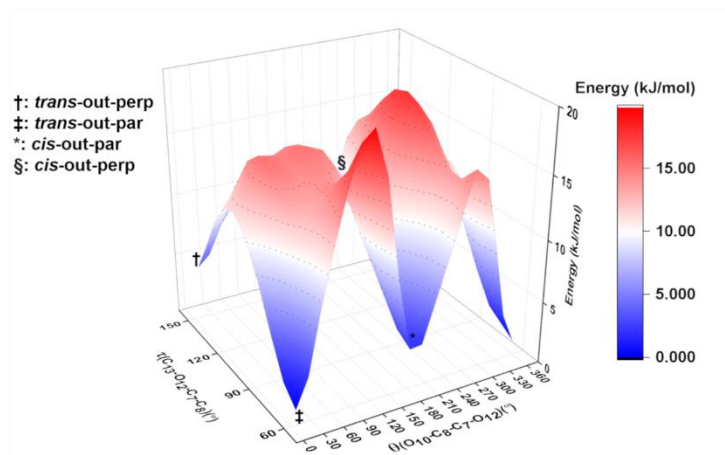

**Fig S6:** Scan of the potential energy curve for the dihedral angles  $\varphi(\text{H}_{11}\text{-O}_{10}\text{-C}_8\text{-C}_7)$  and  $\theta(\text{O}_{10}\text{-C}_8\text{-C}_7\text{-O}_{12})$  at the B3LYP-D3(BJ)/def2-TZVP level of theory using ORCA for in-out and *cis-trans* motions of *cis-in-par*. The position of the observed conformations is indicated in the plot and illustrated with the corresponding structure. See Figure S1 for atom labelling.

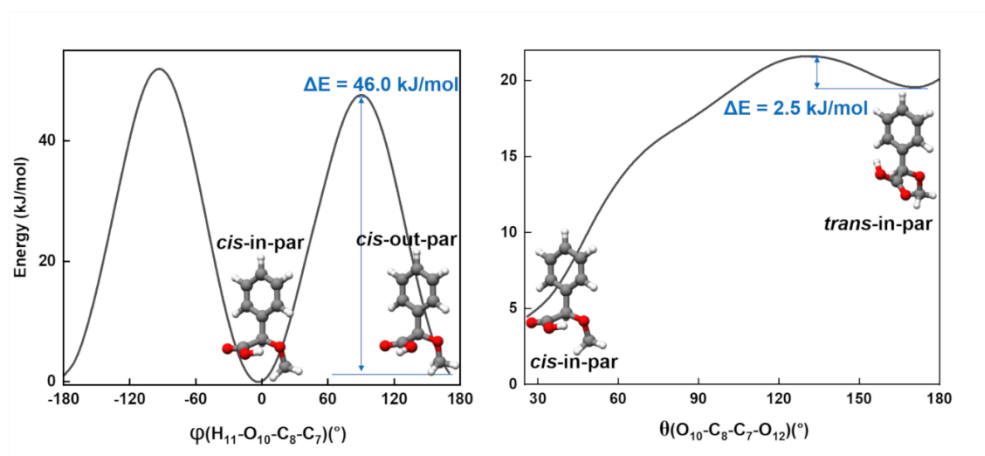



**Fig S7:** Scan of the potential energy curve for the dihedral angles  $\tau(\text{C}_{13}\text{-O}_{12}\text{-C}_7\text{-C}_8)$  at the B3LYP-D3(BJ)/def2-TZVP level of theory using ORCA for par-perp motion of *cis*-out-par. The position of the observed conformations is indicated in the plot and illustrated with the corresponding structure. See Figure S1 for atom labelling.

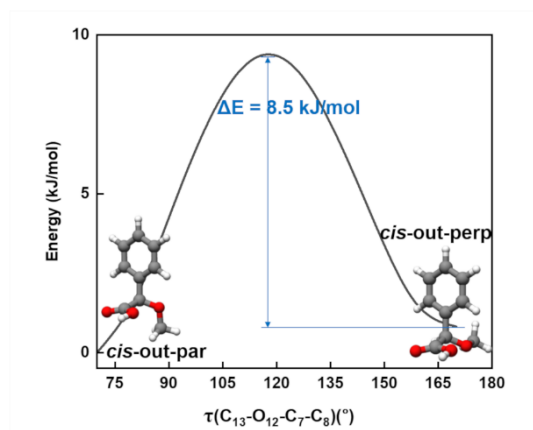

**Fig S8:** Scan of the potential energy curve for the dihedral angles  $\theta(O_{10}-C_8-C_7-O_{12})$  and  $\varphi(H_{11}-O_{10}-C_8-C_7)$  at the B3LYP-D3(BJ)/def2-TZVP level of theory using ORCA for *cis-trans*, in-out motions of *trans-out-perp*. The position of the observed conformations is indicated in the plot and illustrated with the corresponding structure. See Figure S1 for atom labelling.

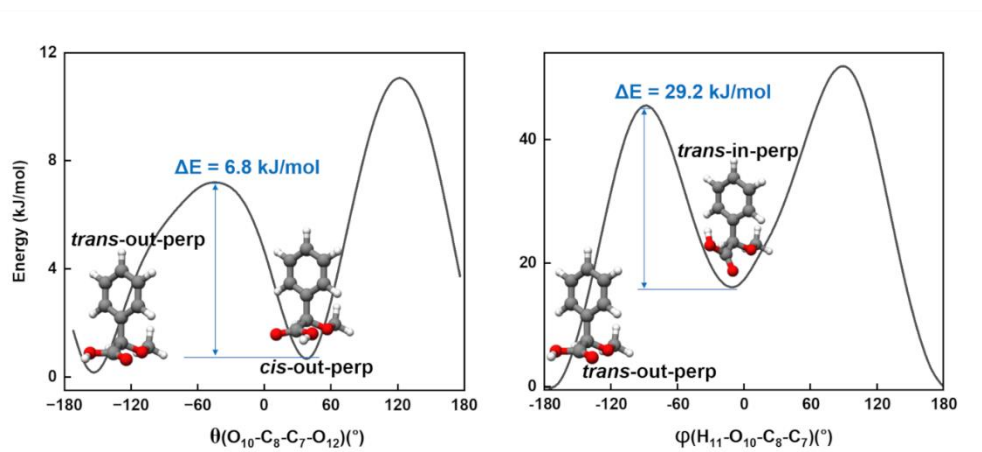

**Fig S9:** Scan of the potential energy curve for the dihedral angle  $\tau(\text{C}_{13}\text{-O}_{12}\text{-C}_7\text{-C}_8)$  at the B3LYP-D3(BJ)/def2-TZVP level of theory using ORCA for par-perp motion of *trans*-in-par. The position of the observed conformations is indicated in the plot and illustrated with the corresponding structure. See Figure S1 for atom labelling.

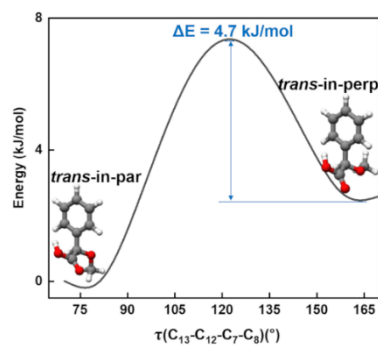

**Fig S10:** The orange, black, and maroon traces show portions of rotational spectra obtained with He, Ne, and Ar carrier gases. The lower traces (in color) represent simulations employing the fitted rotational parameters of different conformers of AMPA as given in Table 2 of the manuscript.

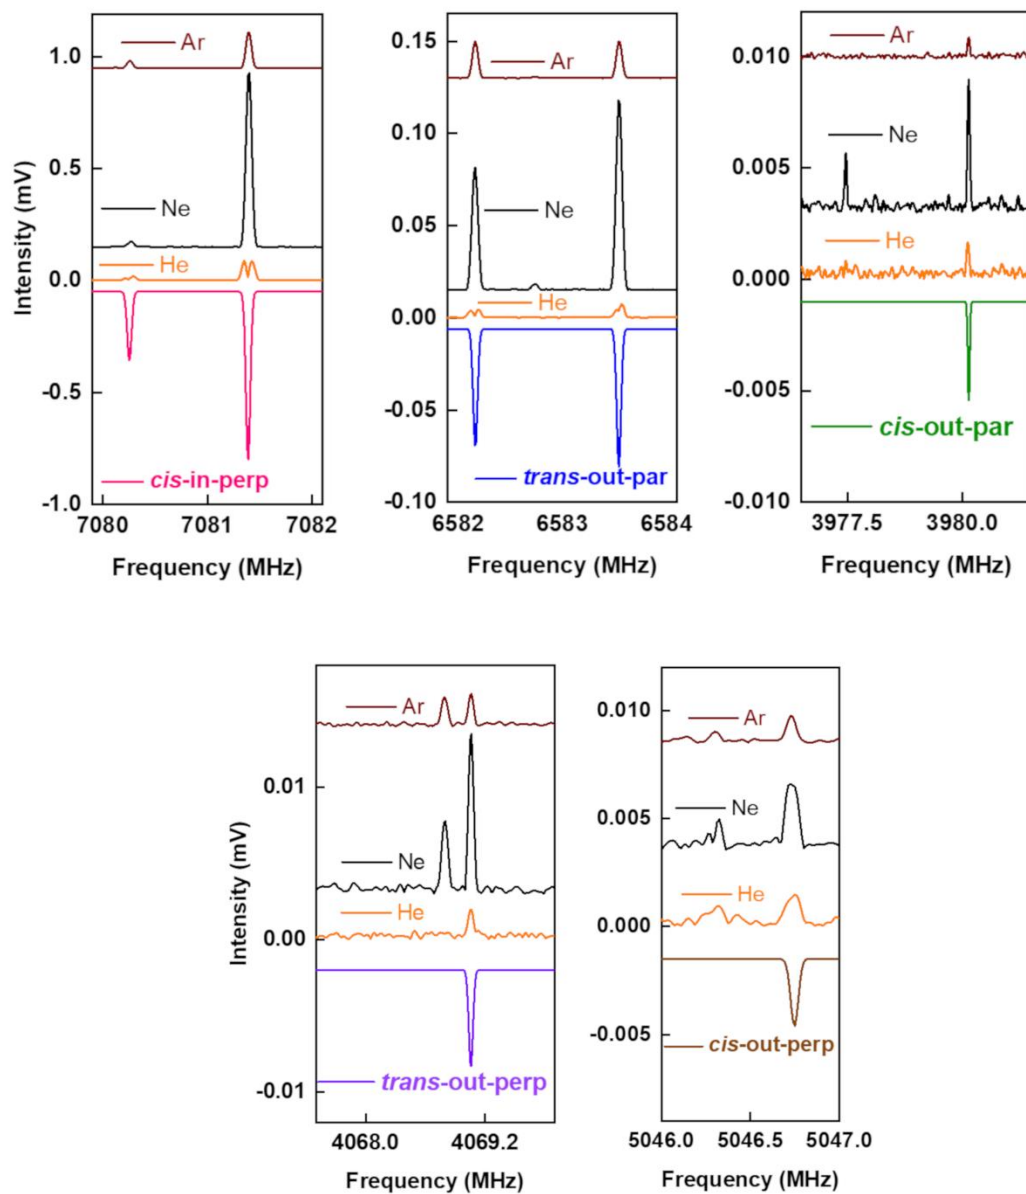

**Fig S11:** Relaxed potential energy scans B3LYP-D3(BJ)/def2-TZVP for the internal rotation of the OCH<sub>3</sub> rotor for the conformers *cis*-out-par, *trans*-out-perp, and *cis*-out-perp. The experimental barrier for those three conformers could not be fitted.

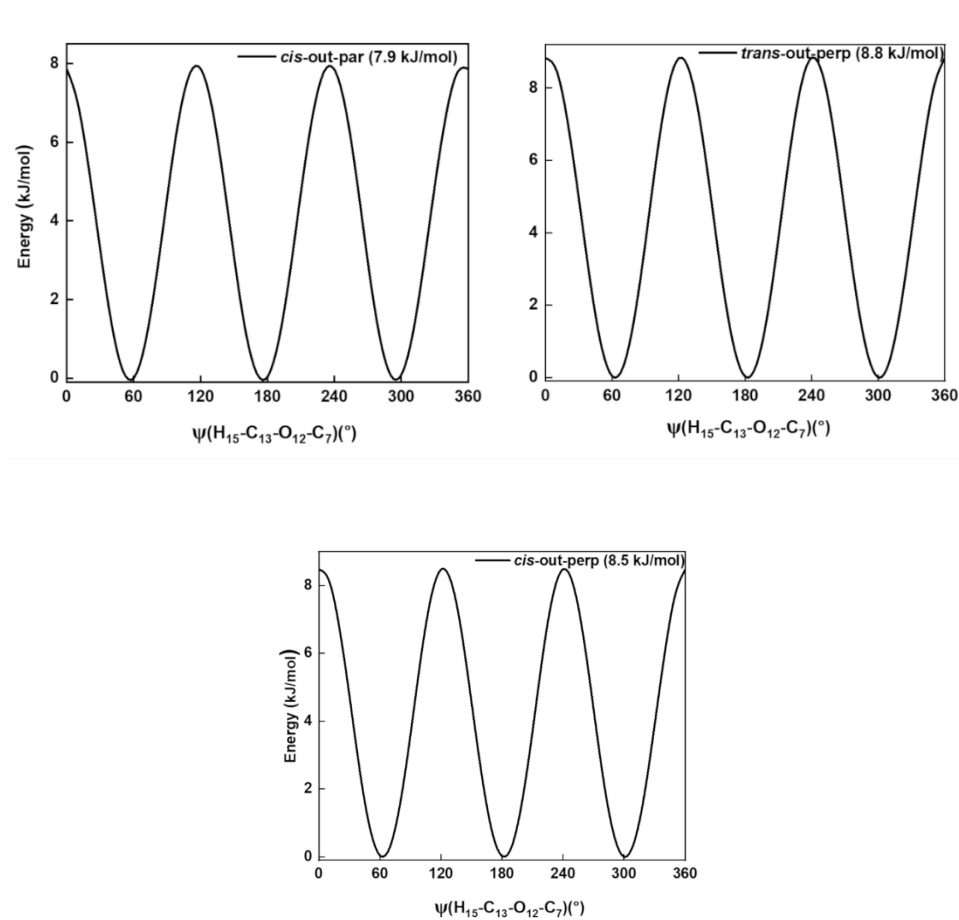

**Table S1:** Dihedral angles for three motions of eight conformers of AMPA calculated at the B3LYP-D3(BJ)/def2-TZVP level of theory.

| Parameters                                                   | <i>cis</i> -in-perp | <i>trans</i> -out-par | <i>cis</i> -in-par | <i>cis</i> -out-par | <i>trans</i> -out-perp | <i>cis</i> -out-perp | <i>trans</i> -in-par | <i>trans</i> -in-perp |
|--------------------------------------------------------------|---------------------|-----------------------|--------------------|---------------------|------------------------|----------------------|----------------------|-----------------------|
| $\theta(\text{O}_{10}\text{-C}_8\text{-C}_7\text{-O}_{12})$  | 5.9                 | -158.6                | 25.5               | 34.4                | -153.9                 | 37.9                 | 172.0                | 164.9                 |
| $\varphi(\text{H}_{11}\text{-O}_{10}\text{-C}_8\text{-C}_7)$ | -3.1                | -175.7                | -3.3               | 176.5               | -175.3                 | 177.4                | 12.2                 | -11.1                 |
| $\tau(\text{C}_{13}\text{-O}_{12}\text{-C}_7\text{-C}_8)$    | 166.2               | 68.0                  | 81.5               | 66.9                | 171.9                  | 168.1                | 75.8                 | 164.8                 |

**Table S2:** Experimental rotational parameters obtained for the  $^{13}\text{C}$  isotopologues of the lowest energy conformer *cis*-in-perp obtained using SPFIT.

| Parameters                 | Parent         | $^{13}\text{C}_1$ | $^{13}\text{C}_2$ | $^{13}\text{C}_3$ | $^{13}\text{C}_4$ |
|----------------------------|----------------|-------------------|-------------------|-------------------|-------------------|
| <i>A</i> /MHz <sup>a</sup> | 1436.68000(29) | 1430.33229(39)    | 1432.23130(88)    | 1435.92383(68)    | 1429.22667(32)    |
| <i>B</i> /MHz              | 692.06967(12)  | 689.06106(13)     | 684.44326(21)     | 682.27648(26)     | 685.34323(22)     |
| <i>C</i> /MHz              | 583.21822(12)  | 581.79936(23)     | 577.99070(54)     | 576.32712(24)     | 579.44712(22)     |
| $\Delta_I$ /kHz            | 0.07892(78)    | [0.07892]         | [0.07892]         | [0.07892]         | [0.07892]         |
| $\Delta_{JK}$ /kHz         | 0.3036(19)     | 0.3036(19)        | 0.425(40)         | 0.3036(19)        | [0.3036]          |
| $\Delta_K$ /kHz            | -0.0684(64)    | [-0.0684]         | [-0.0684]         | [-0.0684]         | [-0.0684]         |
| $\delta_J$ /kHz            | 0.00462(13)    | [0.00462]         | [0.00462]         | [0.00462]         | [-0.00462]        |
| $\delta_K$ /kHz            | -0.4362(24)    | -0.426(34)        | -0.74(11)         | [-0.4362]         | [-0.4362]         |
| <i>N</i> <sup>b</sup>      | 248            | 27                | 23                | 21                | 25                |
| $\sigma$ /kHz              | 7.9            | 4.8               | 4.5               | 8.0               | 5.5               |

  

| Parameters         | $^{13}\text{C}_5$ | $^{13}\text{C}_6$ | $^{13}\text{C}_7$ | $^{13}\text{C}_8$ | $^{13}\text{C}_{13}$ |
|--------------------|-------------------|-------------------|-------------------|-------------------|----------------------|
| <i>A</i> /MHz      | 1431.48506(85)    | 1436.52869(48)    | 1435.42559(73)    | 1432.41928(61)    | 1409.04381(73)       |
| <i>B</i> /MHz      | 690.21700(38)     | 691.78772(22)     | 690.92780(20)     | 689.25653(41)     | 690.30708(37)        |
| <i>C</i> /MHz      | 582.39519(34)     | 583.09397(34)     | 582.60399(18)     | 580.53179(32)     | 577.99761(29)        |
| $\Delta_I$ /kHz    | [0.07892]         | [0.07892]         | [0.07892]         | [0.07892]         | [0.07892]            |
| $\Delta_{JK}$ /kHz | [0.3036]          | [0.3036]          | 0.344(11)         | [0.3036]          | [0.3036]             |
| $\Delta_K$ /kHz    | [-0.0684]         | [-0.0684]         | [-0.0684]         | [-0.0684]         | [-0.0684]            |
| $\delta_J$ /kHz    | [-0.00462]        | [-0.00462]        | [-0.00462]        | [-0.00462]        | [-0.00462]           |
| $\delta_K$ /kHz    | [-0.4362]         | -0.461(32)        | [-0.4362]         | [-0.4362]         | [-0.4362]            |
| <i>N</i>           | 20                | 32                | 34                | 23                | 20                   |
| $\sigma$ /kHz      | 7.9               | 7.2               | 6.1               | 7.9               | 9.8                  |

[a] *A*, *B*, and *C* are the rotational constants.  $\Delta_I$ ,  $\Delta_{JK}$ ,  $\Delta_K$ ,  $\delta_J$  and  $\delta_K$  are the quartic centrifugal distortion constants. [b] *N* is the number of fitted transitions.  $\sigma$  is the root-mean-square deviation of the fit.

**Table S3:** Experimental rotational parameters obtained using XIAM for the conformers *cis-in-perp* and *trans-out-par*.

| Parameters                 | <i>cis-in-perp</i> | <i>trans-out-par</i> |
|----------------------------|--------------------|----------------------|
| $A$ /MHz <sup>a</sup>      | 1436.67998(15)     | 1619.14523(24)       |
| $B$ /MHz                   | 692.06955(10)      | 635.06309(16)        |
| $C$ /MHz                   | 583.21803(10)      | 570.21862(16)        |
| $\Delta_J$ /kHz            | 0.0782(60)         | 0.0731(1)            |
| $\Delta_{JK}$ /kHz         | 0.3081(11)         | 0.1412(23)           |
| $\Delta_K$ /kHz            | -0.0797(44)        |                      |
| $\delta_J$ /kHz            | 0.004664(92)       | 0.0046(12)           |
| $\delta_K$ /kHz            | -0.4435(20)        | 0.8733(64)           |
| $a/b/c^b$                  | Y/Y/Y              | N/Y/Y                |
| $V_3$ /kJmol <sup>-1</sup> | 8.263(9)           | 7.552(2)             |
| $N^c$                      | 500                | 332                  |
| $\sigma$ /kHz              | 7.7                | 8.5                  |

[a]  $A$ ,  $B$ , and  $C$  are the rotational constants.  $\Delta_J$ ,  $\Delta_{JK}$ ,  $\Delta_K$ ,  $\delta_J$  and  $\delta_K$  are the quartic centrifugal distortion constants. [b] Y and N indicates whether a, b or c type of rotational transitions were observed or not. [c] N is the number of fitted transitions.  $\sigma$  is the root-mean-square deviation of the fit.

**Table S4:** Experimentally determined bond distances, bond angles, and dihedral angles of conformer *cis-in-perp* using effective structure,  $r_o$ , and substitution structure,  $r_s$ , method in comparison with the equilibrium,  $r_e$ , values obtained from quantum-chemical calculations at the B3LYP-D3(BJ)/def2-TZVP level of theory.

| Bond distance | $r_o$ (Å)  | $r_s$ (Å)  | $r_e$ (Å) |
|---------------|------------|------------|-----------|
| r(C2-C1)      | 1.399(62)  | 1.4037(14) | 1.39      |
| r(C3-C2)      | 1.395(11)  | 1.4062(46) | 1.39      |
| r(C4-C3)      | 1.3899(79) | 1.3883(46) | 1.39      |
| r(C5-C4)      | 1.3955(79) | 1.4026(17) | 1.39      |
| r(C6-C1)      | 1.398(15)  | 1.3470(45) | 1.39      |
| r(C5-C6)      | 1.413(17)  | 1.4711(52) | 1.39      |
| r(C7-C6)      | 1.467(14)  | 1.4542(38) | 1.51      |
| r(C8-C7)      | 1.528(12)  | 1.495(15)  | 1.54      |
| r(O9-C8)      | 1.202(19)  | -          | 1.20      |
| r(O10-C8)     | 1.367(14)  | -          | 1.34      |
| r(O12-C7)     | 1.435(12)  | -          | 1.42      |
| r(C13-O12)    | 1.4255(89) | -          | 1.42      |

| Bond angles                                                  | $r_o$ (°)   | $r_s$ (°)  | $r_e$ (°) |
|--------------------------------------------------------------|-------------|------------|-----------|
| $\Theta$ (C <sub>3</sub> -C <sub>2</sub> -C <sub>1</sub> )   | 120.31 (55) | 119.94(17) | 120.1     |
| $\Theta$ (C <sub>4</sub> -C <sub>3</sub> -C <sub>2</sub> )   | 119.48(31)  | 119.42(10) | 119.8     |
| $\Theta$ (C <sub>5</sub> -C <sub>4</sub> -C <sub>3</sub> )   | 120.42(51)  | 120.76(18) | 120.1     |
| $\Theta$ (C <sub>6</sub> -C <sub>1</sub> -C <sub>2</sub> )   | 121.97(79)  | 122.49(23) | 120.3     |
| $\Theta$ (C <sub>7</sub> -C <sub>6</sub> -C <sub>1</sub> )   | 121.39(12)  | 123.29(47) | 120.3     |
| $\Theta$ (C <sub>8</sub> -C <sub>7</sub> -C <sub>6</sub> )   | 111.28(78)  | 112.42(88) | 110.7     |
| $\Theta$ (C <sub>4</sub> -C <sub>5</sub> -C <sub>6</sub> )   | 120.81(70)  | 119.18(20) | 120.2     |
| $\Theta$ (C <sub>5</sub> -C <sub>6</sub> -C <sub>1</sub> )   | 118.01(85)  | 117.97(25) | 119.5     |
| $\Theta$ (C <sub>5</sub> -C <sub>6</sub> -C <sub>7</sub> )   | 120.58(11)  | 118.70(43) | 120.2     |
| $\Theta$ (C <sub>6</sub> -C <sub>7</sub> -O <sub>12</sub> )  | 113.06(79)  |            | 113.1     |
| $\Theta$ (C <sub>7</sub> -O <sub>12</sub> -C <sub>13</sub> ) | 114.09(51)  |            | 114.1     |
| $\Theta$ (C <sub>7</sub> -C <sub>8</sub> -O <sub>10</sub> )  | 115.12(10)  |            | 115.1     |
| $\Theta$ (C <sub>7</sub> -C <sub>8</sub> -O <sub>9</sub> )   | 122.06(83)  |            | 122.1     |
| $\Theta$ (C <sub>8</sub> -C <sub>7</sub> -O <sub>12</sub> )  | 107.43(60)  |            | 107.6     |
| $\Theta$ (O <sub>9</sub> -C <sub>8</sub> -O <sub>10</sub> )  | 122.82(12)  |            | 122.8     |

| Dihedral angles                                                           | $r_o$ (°)   | $r_s$ (°)   | $r_e$ (°) |
|---------------------------------------------------------------------------|-------------|-------------|-----------|
| $\Phi$ (C <sub>1</sub> -C <sub>2</sub> -C <sub>3</sub> -C <sub>4</sub> )  | -0.16(11)   | -0.70(77)   | -0.2      |
| $\Phi$ (C <sub>1</sub> -C <sub>6</sub> -C <sub>7</sub> -C <sub>8</sub> )  | -94.86(12)  | -100.64(66) | -95.1     |
| $\Phi$ (C <sub>2</sub> -C <sub>3</sub> -C <sub>4</sub> -C <sub>5</sub> )  | -0.18(10)   | -0.28(81)   | -0.2      |
| $\Phi$ (C <sub>3</sub> -C <sub>4</sub> -C <sub>5</sub> -C <sub>6</sub> )  | 0.41(11)    | -1.71(56)   | 0.4       |
| $\Phi$ (C <sub>4</sub> -C <sub>5</sub> -C <sub>6</sub> -C <sub>7</sub> )  | -178.72(83) | -177.34(76) | -178.7    |
| $\Phi$ (C <sub>5</sub> -C <sub>6</sub> -C <sub>1</sub> -C <sub>2</sub> )  | -0.07(14)   | -5.94(33)   | -0.1      |
| $\Phi$ (C <sub>6</sub> -C <sub>1</sub> -C <sub>2</sub> -C <sub>3</sub> )  | 0.29(12)    | 4.03(52)    | 0.3       |
| $\Phi$ (C <sub>5</sub> -C <sub>6</sub> -C <sub>7</sub> -C <sub>8</sub> )  | 83.54(11)   | 81.59(11)   | 83.3      |
| $\Phi$ (C <sub>5</sub> -C <sub>6</sub> -C <sub>7</sub> -O <sub>12</sub> ) | -37.47(13)  |             | -37.4     |



---

|                                                           |             |        |
|-----------------------------------------------------------|-------------|--------|
| $\Phi(\text{C}_6\text{-C}_7\text{-O}_{12}\text{-C}_{13})$ | -71.35(96)  | -71.4  |
| $\Phi(\text{C}_6\text{-C}_7\text{-C}_8\text{-O}_{10})$    | -118.84(10) | -118.8 |
| $\Phi(\text{C}_6\text{-C}_7\text{-C}_8\text{-O}_9)$       | 61.27(12)   | 61.3   |

---

**Table S5:** Line list for the fit obtained using the SPFIT program for *cis*-in-perp conformer, measured rotational transitions are shown as Obs. and the residuals are shown as Diff.

| $J'$ | $K'_a$ | $K'_c$ | $J''$ | $K''_a$ | $K''_c$ | Obs./MHz  | Diff./MHz |
|------|--------|--------|-------|---------|---------|-----------|-----------|
| 1    | 1      | 1      | 0     | 0       | 0       | 2019.8957 | -0.0009   |
| 6    | 2      | 4      | 6     | 1       | 5       | 2022.5574 | 0.0009    |
| 4    | 2      | 2      | 4     | 1       | 3       | 2035.1089 | 0.0002    |
| 4    | 1      | 4      | 3     | 2       | 1       | 2078.2844 | -0.0024   |
| 3    | 2      | 1      | 3     | 1       | 2       | 2132.5369 | 0.0043    |
| 7    | 2      | 5      | 7     | 1       | 6       | 2162.6566 | 0.0010    |
| 5    | 2      | 4      | 4     | 3       | 1       | 2316.2274 | -0.0025   |
| 6    | 1      | 5      | 6     | 0       | 6       | 2401.2643 | -0.0009   |
| 8    | 2      | 6      | 8     | 1       | 7       | 2426.0314 | 0.0019    |
| 2    | 1      | 2      | 1     | 1       | 1       | 2441.7165 | -0.0025   |
| 2    | 0      | 2      | 1     | 0       | 1       | 2539.4933 | 0.0038    |
| 2    | 1      | 1      | 1     | 1       | 0       | 2659.4259 | 0.0008    |
| 3    | 2      | 2      | 3     | 1       | 3       | 2730.2669 | 0.0021    |
| 9    | 2      | 7      | 9     | 1       | 8       | 2822.6073 | 0.0004    |
| 5    | 1      | 5      | 4     | 2       | 2       | 2943.9093 | -0.0061   |
| 4    | 2      | 3      | 4     | 1       | 4       | 2959.5135 | -0.0006   |
| 7    | 1      | 6      | 7     | 0       | 7       | 3015.2416 | -0.0032   |
| 10   | 3      | 7      | 10    | 2       | 8       | 3018.0417 | -0.0056   |
| 9    | 3      | 6      | 9     | 2       | 7       | 3061.8296 | 0.0104    |
| 8    | 4      | 5      | 7     | 5       | 2       | 3130.0999 | -0.0037   |
| 3    | 0      | 3      | 2     | 1       | 2       | 3135.4230 | -0.0018   |
| 8    | 4      | 4      | 7     | 5       | 3       | 3148.1828 | 0.0081    |
| 2    | 1      | 2      | 1     | 0       | 1       | 3186.3268 | -0.0012   |
| 8    | 3      | 5      | 8     | 2       | 6       | 3196.9323 | -0.0018   |
| 4    | 1      | 3      | 3     | 2       | 2       | 3216.5496 | -0.0014   |
| 5    | 2      | 4      | 5     | 1       | 5       | 3248.6737 | -0.0010   |
| 12   | 3      | 9      | 12    | 2       | 10      | 3316.2248 | 0.0085    |
| 10   | 2      | 8      | 10    | 1       | 9       | 3349.6321 | 0.0065    |
| 7    | 3      | 4      | 7     | 2       | 5       | 3384.3888 | 0.0012    |
| 6    | 2      | 5      | 5     | 3       | 2       | 3496.1689 | -0.0041   |
| 2    | 1      | 1      | 1     | 0       | 1       | 3512.8864 | -0.0008   |
| 7    | 3      | 4      | 6     | 4       | 3       | 3556.5810 | 0.0166    |
| 6    | 3      | 3      | 6     | 2       | 4       | 3581.9832 | 0.0001    |
| 6    | 2      | 5      | 6     | 1       | 6       | 3596.6371 | 0.0003    |
| 6    | 1      | 6      | 5     | 2       | 3       | 3652.8250 | -0.0075   |
| 3    | 1      | 3      | 2     | 1       | 2       | 3655.9648 | -0.0016   |
| 8    | 1      | 7      | 8     | 0       | 8       | 3691.5783 | -0.0002   |
| 5    | 3      | 2      | 5     | 2       | 3       | 3753.2932 | -0.0031   |
| 3    | 0      | 3      | 2     | 0       | 2       | 3782.2679 | 0.0047    |
| 3    | 2      | 2      | 2     | 2       | 1       | 3825.8417 | -0.0061   |
| 3    | 2      | 1      | 2     | 2       | 0       | 3869.4402 | 0.0004    |
| 4    | 3      | 1      | 4     | 2       | 2       | 3876.3620 | 0.0018    |
| 3    | 3      | 0      | 3     | 2       | 1       | 3947.8279 | 0.0196    |
| 3    | 1      | 2      | 2     | 1       | 1       | 3981.8129 | -0.0022   |
| 11   | 2      | 9      | 11    | 1       | 10      | 3987.9264 | -0.0095   |
| 14   | 4      | 10     | 14    | 3       | 11      | 3996.7294 | -0.0002   |
| 7    | 2      | 6      | 7     | 1       | 7       | 4000.1542 | -0.0004   |
| 3    | 3      | 1      | 3     | 2       | 2       | 4001.7632 | -0.0110   |
| 15   | 4      | 11     | 15    | 3       | 12      | 4006.6981 | 0.0049    |
| 4    | 3      | 2      | 4     | 2       | 3       | 4030.6035 | 0.0001    |
| 4    | 3      | 1      | 4     | 2       | 3       | 4035.5515 | 0.0083    |
| 5    | 3      | 3      | 5     | 2       | 4       | 4086.4105 | -0.0025   |
| 5    | 3      | 2      | 5     | 2       | 4       | 4105.9442 | 0.0018    |
| 13   | 4      | 9      | 13    | 3       | 10      | 4119.2966 | 0.0072    |
| 6    | 2      | 4      | 5     | 3       | 3       | 4170.1252 | 0.0034    |
| 6    | 3      | 4      | 6     | 2       | 5       | 4179.0181 | -0.0031   |
| 7    | 1      | 7      | 6     | 2       | 4       | 4187.5877 | -0.0065   |
| 3    | 1      | 3      | 2     | 0       | 2       | 4302.8006 | -0.0043   |
| 7    | 3      | 5      | 7     | 2       | 6       | 4317.3961 | 0.0029    |
| 12   | 4      | 8      | 12    | 3       | 9       | 4337.6892 | 0.0011    |
| 9    | 1      | 8      | 9     | 0       | 9       | 4396.2484 | -0.0043   |
| 9    | 4      | 6      | 8     | 5       | 3       | 4445.8197 | -0.0040   |
| 8    | 2      | 7      | 8     | 1       | 8       | 4453.8230 | -0.0002   |
| 4    | 0      | 4      | 3     | 1       | 3       | 4476.0424 | -0.0023   |
| 8    | 3      | 6      | 8     | 2       | 7       | 4508.7517 | 0.0014    |
| 7    | 2      | 6      | 6     | 3       | 3       | 4605.7630 | -0.0027   |
| 11   | 4      | 7      | 11    | 3       | 8       | 4606.6703 | 0.0036    |
| 8    | 3      | 6      | 7     | 4       | 3       | 4693.9085 | 0.0017    |
| 12   | 2      | 10     | 12    | 1       | 11      | 4704.4351 | 0.0030    |
| 5    | 1      | 4      | 4     | 2       | 3       | 4716.3585 | 0.0018    |
| 9    | 3      | 7      | 9     | 2       | 8       | 4757.9047 | 0.0005    |
| 4    | 1      | 4      | 3     | 1       | 3       | 4863.2261 | -0.0013   |
| 10   | 4      | 6      | 10    | 3       | 7       | 4879.8257 | -0.0029   |

|    |   |    |    |   |    |           |         |
|----|---|----|----|---|----|-----------|---------|
| 2  | 2 | 1  | 1  | 1 | 0  | 4893.2482 | -0.0010 |
| 9  | 2 | 8  | 9  | 1 | 9  | 4950.5300 | -0.0032 |
| 3  | 1 | 2  | 2  | 0 | 2  | 4955.2039 | -0.0090 |
| 8  | 3 | 5  | 7  | 4 | 4  | 4989.2646 | -0.0003 |
| 2  | 2 | 0  | 1  | 1 | 1  | 5013.1965 | 0.0103  |
| 10 | 3 | 8  | 10 | 2 | 9  | 5066.8451 | 0.0056  |
| 4  | 2 | 3  | 3  | 2 | 2  | 5092.4746 | -0.0020 |
| 10 | 1 | 9  | 10 | 0 | 10 | 5101.6937 | 0.0005  |
| 4  | 3 | 2  | 3  | 3 | 1  | 5121.3132 | 0.0073  |
| 4  | 3 | 1  | 3  | 3 | 0  | 5125.5311 | -0.0047 |
| 4  | 2 | 2  | 3  | 2 | 1  | 5196.9813 | -0.0026 |
| 4  | 1 | 3  | 3  | 1 | 2  | 5294.4069 | -0.0010 |
| 8  | 4 | 4  | 8  | 3 | 5  | 5303.8702 | 0.0050  |
| 4  | 1 | 4  | 3  | 0 | 3  | 5383.7664 | -0.0026 |
| 7  | 4 | 3  | 7  | 3 | 4  | 5429.8799 | 0.0059  |
| 11 | 3 | 9  | 11 | 2 | 10 | 5434.5713 | 0.0004  |
| 10 | 2 | 9  | 10 | 1 | 10 | 5482.2591 | -0.0041 |
| 6  | 4 | 2  | 6  | 3 | 3  | 5506.8924 | 0.0018  |
| 5  | 4 | 1  | 5  | 3 | 2  | 5549.2693 | 0.0144  |
| 7  | 4 | 4  | 7  | 3 | 5  | 5562.4151 | 0.0064  |
| 6  | 4 | 3  | 6  | 3 | 4  | 5562.5949 | 0.0004  |
| 5  | 4 | 2  | 5  | 3 | 3  | 5568.4415 | -0.0050 |
| 4  | 4 | 0  | 4  | 3 | 1  | 5570.1620 | 0.0012  |
| 4  | 4 | 1  | 4  | 3 | 2  | 5575.0611 | -0.0018 |
| 8  | 4 | 5  | 8  | 3 | 6  | 5575.1953 | 0.0087  |
| 8  | 4 | 4  | 8  | 3 | 6  | 5593.1513 | 0.0121  |
| 9  | 4 | 6  | 9  | 3 | 7  | 5610.0911 | -0.0021 |
| 8  | 2 | 7  | 7  | 3 | 4  | 5615.0282 | -0.0024 |
| 10 | 4 | 7  | 10 | 3 | 8  | 5677.2291 | 0.0013  |
| 7  | 2 | 5  | 6  | 3 | 4  | 5734.7742 | 0.0028  |
| 10 | 4 | 7  | 9  | 5 | 4  | 5765.3921 | 0.0185  |
| 11 | 4 | 8  | 11 | 3 | 9  | 5786.4978 | 0.0024  |
| 11 | 1 | 10 | 11 | 0 | 11 | 5792.1974 | 0.0054  |
| 5  | 0 | 5  | 4  | 1 | 4  | 5795.4563 | 0.0021  |
| 12 | 3 | 10 | 12 | 2 | 11 | 5857.3255 | 0.0109  |
| 10 | 4 | 6  | 9  | 5 | 5  | 5869.8355 | 0.0136  |
| 9  | 3 | 7  | 8  | 4 | 4  | 5944.4489 | -0.0090 |
| 11 | 2 | 10 | 11 | 1 | 11 | 6040.9650 | -0.0078 |
| 3  | 2 | 2  | 2  | 1 | 1  | 6059.6670 | -0.0049 |
| 5  | 1 | 5  | 4  | 1 | 4  | 6062.6110 | -0.0015 |
| 3  | 2 | 1  | 2  | 1 | 1  | 6114.3419 | -0.0058 |
| 14 | 5 | 9  | 14 | 4 | 10 | 6158.2334 | 0.0009  |
| 13 | 4 | 10 | 13 | 3 | 11 | 6163.6748 | -0.0040 |
| 5  | 0 | 5  | 4  | 0 | 4  | 6182.6342 | -0.0027 |
| 14 | 2 | 12 | 14 | 1 | 13 | 6221.4289 | 0.0034  |
| 6  | 1 | 5  | 5  | 2 | 4  | 6233.9612 | -0.0171 |
| 13 | 3 | 11 | 13 | 2 | 12 | 6328.9923 | 0.0010  |
| 5  | 2 | 4  | 4  | 2 | 3  | 6351.7760 | 0.0030  |
| 3  | 2 | 2  | 2  | 1 | 2  | 6386.2347 | 0.0034  |
| 5  | 4 | 2  | 4  | 4 | 1  | 6400.9596 | -0.0066 |
| 5  | 4 | 1  | 4  | 4 | 0  | 6401.2665 | 0.0002  |
| 5  | 3 | 3  | 4  | 3 | 2  | 6407.5867 | 0.0041  |
| 5  | 3 | 2  | 4  | 3 | 1  | 6422.1644 | -0.0079 |
| 3  | 2 | 1  | 2  | 1 | 2  | 6440.9065 | -0.0005 |
| 5  | 1 | 5  | 4  | 0 | 4  | 6449.7942 | -0.0009 |
| 13 | 5 | 8  | 13 | 4 | 9  | 6456.0543 | -0.0206 |
| 12 | 1 | 11 | 12 | 0 | 12 | 6463.0911 | 0.0150  |
| 4  | 1 | 3  | 3  | 0 | 3  | 6467.3634 | 0.0059  |
| 9  | 2 | 8  | 8  | 3 | 5  | 6490.4228 | 0.0038  |
| 9  | 3 | 6  | 8  | 4 | 5  | 6498.6875 | 0.0049  |
| 5  | 2 | 3  | 4  | 2 | 2  | 6545.2421 | 0.0060  |
| 5  | 1 | 4  | 4  | 1 | 3  | 6592.2835 | 0.0011  |
| 12 | 2 | 11 | 12 | 1 | 12 | 6619.3518 | -0.0084 |
| 12 | 5 | 7  | 12 | 4 | 8  | 6692.3485 | 0.0097  |
| 14 | 3 | 12 | 14 | 2 | 13 | 6841.9987 | -0.0024 |
| 11 | 5 | 6  | 11 | 4 | 7  | 6864.7828 | 0.0005  |
| 10 | 5 | 5  | 10 | 4 | 6  | 6982.7622 | -0.0192 |
| 12 | 5 | 8  | 12 | 4 | 9  | 7052.2776 | 0.0018  |
| 9  | 5 | 4  | 9  | 4 | 5  | 7059.8701 | -0.0162 |
| 11 | 5 | 7  | 11 | 4 | 8  | 7060.7625 | 0.0014  |
| 13 | 5 | 9  | 13 | 4 | 10 | 7063.7302 | 0.0014  |
| 10 | 5 | 6  | 10 | 4 | 7  | 7080.2649 | 0.0120  |
| 6  | 0 | 6  | 5  | 1 | 5  | 7081.3854 | -0.0024 |
| 11 | 4 | 8  | 10 | 5 | 5  | 7082.4793 | -0.0287 |
| 7  | 1 | 6  | 6  | 2 | 4  | 7096.7089 | -0.0087 |
| 9  | 5 | 5  | 9  | 4 | 6  | 7103.6751 | -0.0070 |
| 14 | 5 | 10 | 14 | 4 | 11 | 7105.1948 | 0.0018  |

|    |   |    |    |   |    |           |         |
|----|---|----|----|---|----|-----------|---------|
| 8  | 5 | 3  | 8  | 4 | 4  | 7108.7229 | -0.0046 |
| 13 | 1 | 12 | 13 | 0 | 13 | 7116.2136 | 0.0059  |
| 8  | 5 | 4  | 8  | 4 | 5  | 7126.1615 | -0.0095 |
| 7  | 5 | 2  | 7  | 4 | 3  | 7138.9927 | 0.0030  |
| 7  | 5 | 3  | 7  | 4 | 4  | 7144.9624 | 0.0070  |
| 10 | 3 | 8  | 9  | 4 | 5  | 7148.0324 | 0.0004  |
| 6  | 5 | 1  | 6  | 4 | 2  | 7157.3615 | 0.0215  |
| 6  | 5 | 2  | 6  | 4 | 3  | 7158.9927 | -0.0048 |
| 5  | 5 | 0  | 5  | 4 | 1  | 7168.1100 | -0.0059 |
| 5  | 5 | 1  | 5  | 4 | 2  | 7168.4451 | -0.0068 |
| 4  | 2 | 3  | 3  | 1 | 2  | 7170.3317 | -0.0017 |
| 15 | 5 | 11 | 15 | 4 | 12 | 7186.8927 | 0.0013  |
| 10 | 2 | 9  | 9  | 3 | 6  | 7200.5676 | -0.0053 |
| 13 | 2 | 12 | 13 | 1 | 13 | 7211.3235 | -0.0171 |
| 8  | 2 | 6  | 7  | 3 | 4  | 7216.1222 | 0.0015  |
| 6  | 1 | 6  | 5  | 1 | 5  | 7254.1603 | 0.0069  |
| 11 | 4 | 7  | 10 | 5 | 6  | 7297.3482 | 0.0164  |
| 4  | 2 | 2  | 3  | 1 | 2  | 7329.5141 | -0.0024 |
| 6  | 0 | 6  | 5  | 0 | 5  | 7348.5508 | 0.0048  |
| 8  | 2 | 6  | 7  | 3 | 5  | 7354.7456 | 0.0061  |
| 6  | 1 | 6  | 5  | 0 | 5  | 7521.3157 | 0.0042  |
| 6  | 2 | 5  | 5  | 2 | 4  | 7602.1189 | 0.0035  |
| 6  | 5 | 2  | 5  | 5 | 1  | 7679.4205 | 0.0031  |
| 6  | 5 | 1  | 5  | 5 | 0  | 7679.4205 | -0.0149 |
| 6  | 4 | 3  | 5  | 4 | 2  | 7688.8975 | 0.0258  |
| 6  | 4 | 2  | 5  | 4 | 1  | 7690.2119 | 0.0006  |
| 6  | 3 | 4  | 5  | 3 | 3  | 7694.7486 | 0.0250  |
| 11 | 2 | 10 | 10 | 3 | 7  | 7724.0501 | -0.0016 |
| 6  | 3 | 3  | 5  | 3 | 2  | 7732.5715 | -0.0040 |
| 7  | 1 | 6  | 6  | 2 | 5  | 7751.1386 | 0.0016  |
| 14 | 1 | 13 | 14 | 0 | 14 | 7755.7596 | 0.0264  |
| 14 | 2 | 13 | 14 | 1 | 14 | 7812.2060 | -0.0069 |
| 3  | 3 | 1  | 2  | 2 | 0  | 7816.5341 | -0.0042 |
| 3  | 3 | 0  | 2  | 2 | 0  | 7817.2559 | 0.0078  |
| 4  | 2 | 3  | 3  | 1 | 3  | 7822.7485 | 0.0070  |
| 3  | 3 | 0  | 2  | 2 | 1  | 7828.3411 | 0.0092  |
| 6  | 1 | 5  | 5  | 1 | 4  | 7869.3891 | -0.0055 |
| 6  | 2 | 4  | 5  | 2 | 3  | 7903.8830 | -0.0057 |
| 4  | 2 | 2  | 3  | 1 | 3  | 7981.9213 | -0.0032 |
| 6  | 3 | 3  | 5  | 4 | 2  | 2183.6638 | 0.0053  |
| 2  | 2 | 0  | 2  | 1 | 1  | 2244.9148 | 0.0069  |
| 5  | 2 | 3  | 4  | 3 | 2  | 2673.8168 | 0.0011  |
| 11 | 3 | 8  | 11 | 2 | 9  | 3095.9666 | -0.0113 |
| 7  | 3 | 5  | 6  | 4 | 2  | 3416.2827 | 0.0145  |
| 13 | 3 | 10 | 13 | 2 | 11 | 3689.1646 | -0.0037 |
| 10 | 5 | 6  | 9  | 6 | 3  | 4122.2482 | -0.0058 |
| 10 | 5 | 5  | 9  | 6 | 4  | 4127.4985 | -0.0057 |
| 14 | 3 | 11 | 14 | 2 | 12 | 4212.0998 | 0.0074  |
| 7  | 3 | 5  | 7  | 2 | 5  | 3245.7720 | 0.0031  |
| 8  | 3 | 6  | 8  | 2 | 6  | 2907.6618 | 0.0017  |
| 6  | 3 | 4  | 6  | 2 | 4  | 3524.5965 | -0.0053 |
| 4  | 3 | 2  | 4  | 2 | 2  | 3871.4203 | -0.0001 |
| 3  | 3 | 0  | 3  | 2 | 2  | 4002.5037 | 0.0197  |
| 6  | 3 | 3  | 6  | 2 | 5  | 4236.3966 | -0.0060 |
| 6  | 2 | 4  | 6  | 1 | 6  | 4251.0537 | -0.0025 |
| 11 | 4 | 8  | 11 | 3 | 8  | 4397.0539 | -0.0026 |
| 7  | 3 | 4  | 7  | 2 | 6  | 4456.0175 | 0.0056  |
| 8  | 1 | 8  | 7  | 2 | 5  | 4545.5989 | 0.0040  |
| 5  | 1 | 4  | 4  | 2 | 2  | 4557.1749 | 0.0012  |
| 8  | 3 | 6  | 7  | 4 | 4  | 4699.9884 | -0.0024 |
| 11 | 1 | 11 | 10 | 2 | 8  | 4701.1428 | 0.0166  |
| 5  | 0 | 5  | 4  | 1 | 3  | 4711.8573 | -0.0085 |
| 9  | 1 | 9  | 8  | 2 | 6  | 4736.8302 | 0.0103  |
| 7  | 1 | 7  | 6  | 2 | 5  | 4842.0117 | -0.0019 |
| 3  | 0 | 3  | 2  | 1 | 1  | 2808.8588 | -0.0067 |
| 4  | 1 | 3  | 3  | 2 | 1  | 3161.8723 | -0.0029 |
| 6  | 1 | 6  | 5  | 2 | 4  | 4005.4751 | -0.0036 |
| 15 | 3 | 12 | 15 | 2 | 13 | 4865.8176 | 0.0066  |
| 4  | 0 | 4  | 3  | 0 | 3  | 4996.5749 | -0.0115 |
| 9  | 4 | 6  | 9  | 3 | 6  | 5073.8270 | 0.0058  |
| 12 | 6 | 7  | 11 | 7 | 4  | 5110.7185 | -0.0083 |
| 12 | 6 | 6  | 11 | 7 | 5  | 5112.1809 | -0.0034 |
| 9  | 4 | 5  | 9  | 3 | 6  | 5119.3669 | -0.0134 |
| 8  | 4 | 5  | 8  | 3 | 5  | 5285.9113 | -0.0012 |
| 9  | 3 | 6  | 9  | 2 | 8  | 5294.1543 | -0.0219 |
| 16 | 3 | 13 | 16 | 2 | 14 | 5615.8259 | -0.0158 |
| 8  | 1 | 8  | 7  | 2 | 6  | 5617.2179 | -0.0014 |

|    |   |    |    |   |    |           |         |
|----|---|----|----|---|----|-----------|---------|
| 7  | 2 | 5  | 6  | 3 | 3  | 5677.3940 | 0.0041  |
| 6  | 1 | 5  | 5  | 2 | 3  | 5881.3360 | 0.0038  |
| 12 | 4 | 9  | 12 | 3 | 10 | 5946.5173 | 0.0093  |
| 9  | 3 | 7  | 8  | 4 | 5  | 5962.4079 | -0.0027 |
| 7  | 0 | 7  | 6  | 1 | 5  | 6104.0310 | 0.0018  |
| 9  | 1 | 9  | 8  | 2 | 7  | 6337.9098 | -0.0003 |
| 13 | 6 | 7  | 12 | 7 | 6  | 6441.5113 | -0.0052 |
| 14 | 4 | 11 | 14 | 3 | 12 | 6441.6075 | 0.0001  |
| 8  | 0 | 8  | 7  | 1 | 6  | 6645.5420 | -0.0138 |
| 9  | 2 | 8  | 8  | 3 | 6  | 6779.6878 | -0.0052 |
| 12 | 5 | 8  | 11 | 6 | 5  | 6780.3761 | 0.0004  |
| 15 | 4 | 12 | 15 | 3 | 13 | 6780.8011 | 0.0063  |
| 13 | 4 | 9  | 13 | 3 | 11 | 6841.4284 | -0.0038 |
| 9  | 5 | 5  | 9  | 4 | 5  | 7058.0993 | -0.0236 |
| 9  | 0 | 9  | 8  | 1 | 7  | 7126.8938 | 0.0139  |
| 10 | 3 | 8  | 9  | 4 | 6  | 7193.5801 | -0.0111 |
| 10 | 0 | 10 | 9  | 1 | 8  | 7582.5488 | -0.0078 |
| 5  | 3 | 2  | 5  | 0 | 5  | 7621.7694 | -0.0059 |
| 10 | 2 | 9  | 9  | 3 | 7  | 7736.8441 | -0.0007 |
| 14 | 6 | 9  | 13 | 7 | 6  | 7774.8546 | 0.0056  |
| 3  | 3 | 1  | 2  | 2 | 1  | 7827.6051 | -0.0169 |

---

**Table S6:** Line list for the fit obtained using the SPFIT program for *trans*-out-par, measured rotational transitions are shown as Obs. and the residuals are shown as Diff.

| J' | K' <sub>a</sub> | K' <sub>c</sub> | J'' | K'' <sub>a</sub> | K'' <sub>c</sub> | Obs./MHz  | Diff./MHz |
|----|-----------------|-----------------|-----|------------------|------------------|-----------|-----------|
| 1  | 1               | 1               | 0   | 0                | 0                | 2189.3643 | -0.0032   |
| 2  | 1               | 2               | 1   | 0                | 1                | 3329.8025 | -0.0038   |
| 3  | 1               | 3               | 2   | 0                | 2                | 4439.0266 | -0.0020   |
| 4  | 1               | 4               | 3   | 0                | 3                | 5521.0384 | -0.0029   |
| 5  | 1               | 5               | 4   | 0                | 4                | 6582.1601 | -0.0036   |
| 6  | 1               | 6               | 5   | 0                | 5                | 7630.5315 | -0.0133   |
| 3  | 0               | 3               | 2   | 1                | 2                | 2681.1446 | 0.0019    |
| 4  | 0               | 4               | 3   | 1                | 3                | 3954.9941 | 0.0018    |
| 5  | 0               | 5               | 4   | 1                | 4                | 5235.9150 | 0.0015    |
| 6  | 0               | 6               | 5   | 1                | 5                | 6514.4494 | -0.0001   |
| 7  | 0               | 7               | 6   | 1                | 6                | 7782.2122 | -0.0045   |
| 2  | 2               | 1               | 1   | 1                | 0                | 5427.6616 | 0.0041    |
| 3  | 2               | 2               | 2   | 1                | 1                | 6568.0627 | -0.0278   |
| 3  | 2               | 1               | 2   | 1                | 2                | 6778.0634 | 0.0021    |
| 4  | 2               | 3               | 3   | 1                | 2                | 7675.6660 | -0.0067   |
| 5  | 1               | 5               | 4   | 2                | 2                | 2426.5207 | 0.0081    |
| 6  | 1               | 6               | 5   | 2                | 3                | 3361.8998 | 0.0053    |
| 7  | 1               | 7               | 6   | 2                | 4                | 4217.5961 | 0.0028    |
| 6  | 1               | 5               | 5   | 2                | 4                | 4821.7642 | 0.0043    |
| 8  | 1               | 8               | 7   | 2                | 5                | 4982.2423 | 0.0230    |
| 7  | 1               | 6               | 6   | 2                | 5                | 6221.2409 | 0.0110    |
| 8  | 1               | 7               | 7   | 2                | 6                | 7636.0275 | 0.0085    |
| 7  | 2               | 6               | 6   | 3                | 3                | 3267.3308 | -0.0214   |
| 7  | 2               | 5               | 6   | 3                | 4                | 3636.4063 | -0.0072   |
| 8  | 2               | 7               | 7   | 3                | 4                | 4403.3025 | -0.0117   |
| 8  | 2               | 6               | 7   | 3                | 5                | 4999.3425 | 0.0232    |
| 9  | 2               | 8               | 8   | 3                | 5                | 5504.5055 | -0.0079   |
| 1  | 1               | 0               | 0   | 0                | 0                | 2254.2047 | -0.0032   |
| 2  | 1               | 1               | 1   | 0                | 1                | 3524.3183 | -0.0091   |
| 3  | 1               | 2               | 2   | 0                | 2                | 4827.9753 | -0.0022   |
| 4  | 1               | 3               | 3   | 0                | 3                | 6168.7965 | 0.0021    |
| 5  | 1               | 4               | 4   | 0                | 4                | 7552.1723 | -0.0047   |
| 3  | 0               | 3               | 2   | 1                | 1                | 2486.6213 | -0.0002   |
| 4  | 0               | 4               | 3   | 1                | 2                | 3566.0319 | -0.0115   |
| 5  | 0               | 5               | 4   | 1                | 3                | 4588.1479 | -0.0125   |
| 6  | 0               | 6               | 5   | 1                | 4                | 5544.4442 | 0.0080    |
| 7  | 0               | 7               | 6   | 1                | 5                | 6428.3088 | 0.0022    |
| 8  | 0               | 8               | 7   | 1                | 6                | 7236.9878 | -0.0007   |
| 9  | 0               | 9               | 8   | 1                | 7                | 7972.5331 | -0.0070   |
| 2  | 2               | 1               | 1   | 1                | 1                | 5492.5072 | 0.0092    |
| 3  | 2               | 1               | 2   | 1                | 1                | 6583.5437 | 0.0035    |
| 3  | 2               | 2               | 2   | 1                | 2                | 6762.6310 | 0.0193    |
| 4  | 2               | 2               | 3   | 1                | 2                | 7721.6859 | -0.0087   |
| 4  | 1               | 3               | 3   | 2                | 1                | 2071.8751 | -0.0007   |
| 5  | 1               | 4               | 4   | 2                | 2                | 3396.5301 | 0.0043    |
| 5  | 1               | 4               | 4   | 2                | 3                | 3442.5663 | 0.0185    |
| 7  | 1               | 7               | 6   | 2                | 5                | 4424.9048 | 0.0031    |
| 6  | 1               | 5               | 5   | 2                | 3                | 4715.8101 | 0.0055    |
| 8  | 1               | 8               | 7   | 2                | 6                | 5343.5604 | 0.0033    |
| 7  | 1               | 6               | 6   | 2                | 4                | 6013.9210 | -0.0005   |
| 10 | 1               | 10              | 9   | 2                | 8                | 7068.2427 | -0.0012   |
| 8  | 1               | 7               | 7   | 2                | 5                | 7274.6974 | 0.0163    |
| 6  | 2               | 4               | 5   | 3                | 2                | 2313.0946 | -0.0037   |
| 7  | 2               | 6               | 6   | 3                | 4                | 3275.0742 | -0.0014   |
| 7  | 2               | 5               | 6   | 3                | 3                | 3628.6744 | -0.0156   |
| 8  | 2               | 7               | 7   | 3                | 5                | 4422.5033 | 0.0156    |
| 8  | 2               | 6               | 7   | 3                | 4                | 4980.1406 | -0.0053   |
| 9  | 2               | 7               | 8   | 3                | 5                | 6363.6659 | 0.0038    |
| 10 | 2               | 8               | 9   | 3                | 6                | 7770.2043 | -0.0074   |
| 8  | 3               | 5               | 7   | 4                | 3                | 2611.6245 | -0.0054   |
| 9  | 3               | 7               | 8   | 4                | 5                | 3786.5611 | -0.0105   |
| 10 | 3               | 8               | 9   | 4                | 6                | 5000.6542 | -0.0001   |
| 7  | 1               | 6               | 7   | 0                | 7                | 2188.8734 | 0.0011    |
| 8  | 1               | 7               | 8   | 0                | 8                | 2590.6758 | -0.0003   |
| 9  | 1               | 8               | 9   | 0                | 9                | 3055.7852 | 0.0038    |
| 10 | 1               | 9               | 10  | 0                | 10               | 3575.5153 | -0.0003   |
| 11 | 1               | 10              | 11  | 0                | 11               | 4137.6497 | 0.0030    |
| 12 | 1               | 11              | 12  | 0                | 12               | 4728.2047 | -0.0030   |
| 14 | 1               | 13              | 14  | 0                | 14               | 5942.0081 | 0.0029    |
| 8  | 2               | 6               | 8   | 1                | 7                | 2545.3357 | -0.0118   |
| 7  | 2               | 5               | 7   | 1                | 6                | 2552.9781 | -0.0054   |
| 9  | 2               | 7               | 9   | 1                | 8                | 2591.6249 | -0.0017   |
| 6  | 2               | 4               | 6   | 1                | 5                | 2603.2423 | -0.0151   |

|    |   |    |    |   |    |           |         |
|----|---|----|----|---|----|-----------|---------|
| 5  | 2 | 3  | 5  | 1 | 4  | 2682.8870 | -0.0072 |
| 10 | 2 | 8  | 10 | 1 | 9  | 2701.0841 | -0.0021 |
| 4  | 2 | 2  | 4  | 1 | 3  | 2777.3849 | -0.0058 |
| 3  | 2 | 1  | 3  | 1 | 2  | 2872.4367 | 0.0084  |
| 11 | 2 | 9  | 11 | 1 | 10 | 2881.2324 | -0.0029 |
| 12 | 2 | 10 | 12 | 1 | 11 | 3137.7103 | -0.0016 |
| 3  | 2 | 2  | 3  | 1 | 3  | 3245.8939 | -0.0337 |
| 4  | 2 | 3  | 4  | 1 | 4  | 3379.1037 | -0.0181 |
| 13 | 2 | 11 | 13 | 1 | 12 | 3473.5233 | -0.0035 |
| 5  | 2 | 4  | 5  | 1 | 5  | 3546.9571 | 0.0047  |
| 6  | 2 | 5  | 6  | 1 | 6  | 3749.8563 | -0.0029 |
| 14 | 2 | 12 | 14 | 1 | 13 | 3887.9492 | -0.0001 |
| 7  | 2 | 6  | 7  | 1 | 7  | 3987.9834 | 0.0096  |
| 8  | 2 | 7  | 8  | 1 | 8  | 4260.9571 | -0.0205 |
| 15 | 2 | 13 | 15 | 1 | 14 | 4375.6485 | -0.0057 |
| 9  | 2 | 8  | 9  | 1 | 9  | 4568.0003 | 0.0048  |
| 10 | 2 | 9  | 10 | 1 | 10 | 4907.5373 | -0.0080 |
| 11 | 2 | 10 | 11 | 1 | 11 | 5277.5525 | 0.0020  |
| 9  | 3 | 6  | 9  | 2 | 7  | 4556.6297 | 0.0095  |
| 8  | 3 | 5  | 8  | 2 | 6  | 4710.9369 | -0.0017 |
| 7  | 3 | 4  | 7  | 2 | 5  | 4839.8793 | -0.0034 |
| 6  | 3 | 3  | 6  | 2 | 4  | 4938.2396 | 0.0246  |
| 5  | 3 | 2  | 5  | 2 | 3  | 5005.9664 | 0.0027  |
| 4  | 3 | 1  | 4  | 2 | 2  | 5047.3750 | 0.0007  |
| 3  | 3 | 0  | 3  | 2 | 1  | 5069.0620 | 0.0025  |
| 3  | 3 | 1  | 3  | 2 | 2  | 5084.4143 | -0.0022 |
| 4  | 3 | 2  | 4  | 2 | 3  | 5092.7476 | -0.0007 |
| 5  | 3 | 3  | 5  | 2 | 4  | 5109.3356 | 0.0024  |
| 6  | 3 | 4  | 6  | 2 | 5  | 5137.8002 | 0.0003  |
| 7  | 3 | 5  | 7  | 2 | 6  | 5182.0238 | -0.0233 |
| 8  | 3 | 6  | 8  | 2 | 7  | 5246.0087 | -0.0279 |
| 10 | 3 | 8  | 10 | 2 | 9  | 5448.2114 | 0.0102  |
| 11 | 3 | 9  | 11 | 2 | 10 | 5592.8917 | 0.0183  |
| 13 | 3 | 11 | 13 | 2 | 12 | 5981.1866 | -0.0133 |
| 12 | 4 | 8  | 12 | 3 | 9  | 6734.9709 | 0.0023  |
| 10 | 4 | 6  | 10 | 3 | 7  | 6947.3118 | -0.0070 |
| 9  | 4 | 5  | 9  | 3 | 6  | 7010.4845 | -0.0023 |
| 8  | 4 | 4  | 8  | 3 | 5  | 7052.6640 | 0.0037  |
| 7  | 4 | 3  | 7  | 3 | 4  | 7079.4728 | 0.0183  |
| 8  | 4 | 5  | 8  | 3 | 6  | 7093.2713 | 0.0059  |
| 6  | 4 | 2  | 6  | 3 | 3  | 7095.5898 | 0.0028  |
| 11 | 4 | 8  | 11 | 3 | 9  | 7096.4505 | -0.0054 |
| 7  | 4 | 4  | 7  | 3 | 5  | 7098.2438 | -0.0066 |
| 6  | 4 | 3  | 6  | 3 | 4  | 7103.2147 | 0.0074  |
| 7  | 2 | 6  | 7  | 1 | 6  | 2191.6419 | -0.0038 |
| 6  | 2 | 5  | 6  | 1 | 5  | 2395.9423 | -0.0067 |
| 5  | 2 | 4  | 5  | 1 | 4  | 2576.9349 | -0.0042 |
| 4  | 2 | 3  | 4  | 1 | 3  | 2731.3680 | -0.0006 |
| 3  | 2 | 2  | 3  | 1 | 2  | 2856.9534 | -0.0252 |
| 3  | 2 | 1  | 3  | 1 | 3  | 3261.3803 | 0.0031  |
| 4  | 2 | 2  | 4  | 1 | 4  | 3425.1368 | -0.0070 |
| 5  | 2 | 3  | 5  | 1 | 5  | 3652.9008 | -0.0067 |
| 6  | 2 | 4  | 6  | 1 | 6  | 3957.1642 | -0.0034 |
| 7  | 2 | 5  | 7  | 1 | 7  | 4349.3035 | -0.0082 |
| 8  | 2 | 6  | 8  | 1 | 8  | 4837.8065 | -0.0028 |
| 9  | 2 | 7  | 9  | 1 | 9  | 5427.1469 | 0.0026  |
| 10 | 2 | 8  | 10 | 1 | 10 | 6117.7449 | 0.0080  |
| 9  | 3 | 7  | 9  | 2 | 7  | 4474.4477 | 0.0066  |
| 8  | 3 | 6  | 8  | 2 | 6  | 4669.1945 | -0.0103 |
| 7  | 3 | 5  | 7  | 2 | 5  | 4820.6823 | -0.0269 |
| 6  | 3 | 4  | 6  | 2 | 4  | 4930.4939 | 0.0024  |
| 5  | 3 | 3  | 5  | 2 | 3  | 5003.3852 | 0.0072  |
| 4  | 3 | 2  | 4  | 2 | 2  | 5046.7375 | 0.0112  |
| 3  | 3 | 1  | 3  | 2 | 1  | 5068.9635 | -0.0033 |
| 3  | 3 | 0  | 3  | 2 | 2  | 5084.5110 | 0.0019  |
| 4  | 3 | 1  | 4  | 2 | 3  | 5093.3988 | 0.0025  |
| 5  | 3 | 2  | 5  | 2 | 4  | 5111.9226 | 0.0036  |
| 6  | 3 | 3  | 6  | 2 | 5  | 5145.5523 | 0.0289  |
| 7  | 3 | 4  | 7  | 2 | 6  | 5201.2230 | 0.0024  |
| 8  | 3 | 5  | 8  | 2 | 7  | 5287.7711 | 0.0008  |
| 9  | 3 | 6  | 9  | 2 | 8  | 5415.7683 | -0.0007 |
| 10 | 3 | 7  | 10 | 2 | 9  | 5597.5171 | 0.0036  |
| 15 | 4 | 12 | 15 | 3 | 12 | 6010.2819 | -0.0057 |
| 13 | 4 | 10 | 13 | 3 | 10 | 6524.9225 | -0.0102 |
| 11 | 4 | 8  | 11 | 3 | 8  | 6842.8511 | 0.0027  |
| 10 | 4 | 7  | 10 | 3 | 7  | 6940.5671 | 0.0139  |
| 9  | 4 | 6  | 9  | 3 | 6  | 7007.5635 | -0.0035 |

|    |   |   |    |   |    |           |         |
|----|---|---|----|---|----|-----------|---------|
| 8  | 4 | 5 | 8  | 3 | 5  | 7051.5358 | 0.0040  |
| 7  | 4 | 4 | 7  | 3 | 4  | 7079.0777 | 0.0007  |
| 9  | 4 | 5 | 9  | 3 | 7  | 7092.6711 | 0.0052  |
| 8  | 4 | 4 | 8  | 3 | 6  | 7094.3979 | 0.0038  |
| 6  | 4 | 3 | 6  | 3 | 3  | 7095.4898 | 0.0060  |
| 10 | 4 | 6 | 10 | 3 | 8  | 7096.6210 | -0.0101 |
| 7  | 4 | 3 | 7  | 3 | 5  | 7098.6335 | 0.0055  |
| 6  | 4 | 2 | 6  | 3 | 4  | 7103.3138 | 0.0033  |
| 12 | 4 | 8 | 12 | 3 | 10 | 7141.3109 | 0.0199  |
| 5  | 4 | 2 | 5  | 3 | 2  | 7104.6830 | -0.0051 |
| 5  | 4 | 1 | 5  | 3 | 2  | 7104.6830 | -0.0258 |
| 5  | 4 | 2 | 5  | 3 | 3  | 7107.3002 | 0.0263  |
| 5  | 4 | 1 | 5  | 3 | 3  | 7107.3002 | 0.0057  |
| 4  | 4 | 1 | 4  | 3 | 1  | 7109.4685 | 0.0007  |
| 4  | 4 | 0 | 4  | 3 | 1  | 7109.4685 | -0.0016 |
| 4  | 4 | 1 | 4  | 3 | 2  | 7110.1175 | 0.0017  |
| 4  | 4 | 0 | 4  | 3 | 2  | 7110.1175 | -0.0006 |

---



**Table S7:** Line list for the fit obtained using the SPFIT program for *cis*-out-par, measured rotational transitions are shown as Obs. and the residuals are shown as Diff.

| $J'$ | $K'_a$ | $K'_c$ | $J''$ | $K''_a$ | $K''_c$ | Obs./MHz  | Diff./MHz |
|------|--------|--------|-------|---------|---------|-----------|-----------|
| 6    | 2      | 5      | 5     | 3       | 3       | 2009.3349 | 0.0153    |
| 1    | 1      | 1      | 0     | 0       | 0       | 2196.5750 | -0.0033   |
| 6    | 1      | 5      | 6     | 0       | 6       | 2210.6445 | 0.0041    |
| 2    | 0      | 2      | 1     | 0       | 1       | 2409.2468 | -0.0075   |
| 2    | 1      | 1      | 1     | 1       | 0       | 2501.7091 | -0.0016   |
| 7    | 2      | 5      | 7     | 1       | 6       | 2584.0631 | -0.0065   |
| 7    | 1      | 6      | 7     | 0       | 7       | 2683.6220 | -0.0032   |
| 3    | 0      | 3      | 2     | 1       | 2       | 2692.5781 | -0.0065   |
| 4    | 2      | 2      | 4     | 1       | 3       | 2754.9949 | 0.0081    |
| 3    | 2      | 1      | 3     | 1       | 2       | 2867.9798 | -0.0035   |
| 2    | 2      | 0      | 2     | 1       | 1       | 2973.1235 | 0.0176    |
| 2    | 2      | 1      | 2     | 1       | 2       | 3228.5175 | -0.0188   |
| 2    | 1      | 2      | 1     | 0       | 1       | 3316.9650 | -0.0094   |
| 3    | 2      | 2      | 3     | 1       | 3       | 3362.3227 | 0.0055    |
| 4    | 0      | 4      | 3     | 1       | 2       | 3458.5020 | -0.0209   |
| 3    | 1      | 3      | 2     | 1       | 2       | 3488.3123 | -0.0064   |
| 4    | 2      | 3      | 4     | 1       | 4       | 3542.3413 | 0.0020    |
| 2    | 1      | 1      | 1     | 0       | 1       | 3577.8762 | -0.0132   |
| 3    | 0      | 3      | 2     | 0       | 2       | 3600.2982 | -0.0065   |
| 3    | 2      | 2      | 2     | 2       | 1       | 3622.1114 | 0.0118    |
| 3    | 1      | 2      | 2     | 1       | 1       | 3749.0139 | -0.0033   |
| 12   | 3      | 9      | 12    | 2       | 10      | 3936.8310 | -0.0138   |
| 4    | 0      | 4      | 3     | 1       | 3       | 3980.1340 | -0.0024   |
| 6    | 2      | 5      | 6     | 1       | 6       | 4043.9255 | -0.0043   |
| 11   | 4      | 8      | 10    | 5       | 5       | 4134.4926 | -0.0076   |
| 4    | 1      | 4      | 3     | 1       | 3       | 4645.1629 | -0.0040   |
| 7    | 3      | 4      | 7     | 2       | 5       | 4769.3792 | -0.0093   |
| 4    | 0      | 4      | 3     | 0       | 3       | 4775.8679 | -0.0026   |
| 6    | 3      | 3      | 6     | 2       | 4       | 4921.2079 | 0.0063    |
| 4    | 1      | 3      | 3     | 1       | 2       | 4991.7579 | 0.0003    |
| 4    | 3      | 1      | 4     | 2       | 2       | 5102.0501 | 0.0011    |
| 4    | 3      | 2      | 4     | 2       | 3       | 5181.3878 | -0.0003   |
| 5    | 3      | 3      | 5     | 2       | 4       | 5210.2240 | -0.0021   |
| 6    | 3      | 4      | 6     | 2       | 5       | 5259.2651 | 0.0092    |
| 5    | 0      | 5      | 4     | 1       | 4       | 5268.0901 | -0.0033   |
| 4    | 1      | 4      | 3     | 0       | 3       | 5440.8969 | -0.0041   |
| 2    | 2      | 0      | 1     | 1       | 1       | 5561.7954 | 0.0072    |
| 5    | 1      | 5      | 4     | 1       | 4       | 5797.5494 | 0.0035    |
| 5    | 0      | 5      | 4     | 0       | 4       | 5933.1242 | 0.0004    |
| 5    | 2      | 4      | 4     | 2       | 3       | 6024.6275 | -0.0008   |
| 5    | 2      | 3      | 4     | 2       | 2       | 6128.2394 | 0.0059    |
| 5    | 1      | 5      | 4     | 0       | 4       | 6462.5767 | 0.0003    |
| 6    | 0      | 6      | 5     | 1       | 5       | 6542.8750 | 0.0093    |
| 3    | 2      | 2      | 2     | 1       | 1       | 6589.7195 | -0.0014   |
| 3    | 2      | 2      | 2     | 1       | 2       | 6850.6277 | -0.0082   |
| 6    | 1      | 6      | 5     | 1       | 5       | 6945.0467 | 0.0092    |
| 6    | 0      | 6      | 5     | 0       | 5       | 7072.3400 | 0.0217    |
| 6    | 2      | 5      | 5     | 2       | 4       | 7219.5355 | -0.0101   |
| 6    | 3      | 4      | 5     | 3       | 3       | 7268.5754 | -0.0001   |
| 11   | 4      | 7      | 11    | 3       | 9       | 7284.3050 | 0.0108    |
| 6    | 1      | 5      | 5     | 1       | 4       | 7454.9508 | -0.0045   |
| 4    | 2      | 3      | 3     | 1       | 2       | 7665.8850 | -0.0076   |
| 7    | 0      | 7      | 6     | 1       | 6       | 7794.8844 | 0.0158    |
| 8    | 1      | 7      | 7     | 2       | 6       | 7895.3082 | -0.0027   |

**Table S8:** Line list for the fit obtained using the SPFIT program for *trans*-out-perp conformer, measured rotational transitions are shown as Obs. and the residuals are shown as Diff.

| $J'$ | $K'_a$ | $K'_c$ | $J''$ | $K''_a$ | $K''_c$ | Obs./MHz  | Diff./MHz |
|------|--------|--------|-------|---------|---------|-----------|-----------|
| 2    | 1      | 2      | 1     | 1       | 1       | 2521.4880 | -0.0003   |
| 2    | 0      | 2      | 1     | 0       | 1       | 2609.2866 | -0.0006   |
| 2    | 1      | 1      | 1     | 1       | 0       | 2717.1183 | 0.0011    |
| 3    | 1      | 3      | 2     | 1       | 2       | 3776.2497 | -0.0098   |
| 3    | 0      | 3      | 2     | 0       | 2       | 3889.5647 | 0.0007    |
| 3    | 2      | 2      | 2     | 2       | 1       | 3928.9448 | 0.0015    |
| 3    | 2      | 1      | 2     | 2       | 0       | 3968.3349 | 0.0015    |
| 3    | 1      | 2      | 2     | 1       | 1       | 4069.0564 | -0.0005   |
| 4    | 1      | 4      | 3     | 1       | 3       | 5024.7317 | 0.0070    |
| 4    | 0      | 4      | 3     | 0       | 3       | 5144.1700 | -0.0040   |
| 4    | 2      | 3      | 3     | 2       | 2       | 5230.7728 | 0.0010    |
| 4    | 3      | 2      | 3     | 3       | 1       | 5256.8177 | 0.0056    |
| 4    | 3      | 1      | 3     | 3       | 0       | 5260.6573 | 0.0001    |
| 4    | 2      | 2      | 3     | 2       | 1       | 5325.1668 | 0.0033    |
| 4    | 1      | 3      | 3     | 1       | 2       | 5412.1362 | 0.0009    |
| 5    | 1      | 5      | 4     | 1       | 4       | 6266.0893 | 0.0002    |
| 5    | 0      | 5      | 4     | 0       | 4       | 6373.3585 | 0.0014    |
| 5    | 2      | 4      | 4     | 2       | 3       | 6525.9813 | 0.0052    |
| 5    | 3      | 3      | 4     | 3       | 2       | 6576.3642 | -0.0113   |
| 5    | 3      | 2      | 4     | 3       | 1       | 6589.6385 | 0.0031    |
| 5    | 2      | 3      | 4     | 2       | 2       | 6700.5919 | 0.0052    |
| 5    | 1      | 4      | 4     | 1       | 3       | 6741.8971 | 0.0021    |
| 6    | 1      | 6      | 5     | 1       | 5       | 7500.3958 | 0.0037    |
| 6    | 0      | 6      | 5     | 0       | 5       | 7584.5254 | -0.0057   |
| 6    | 2      | 5      | 5     | 2       | 4       | 7813.0888 | -0.0043   |
| 6    | 5      | 2      | 5     | 5       | 1       | 7882.9344 | 0.0153    |
| 6    | 5      | 1      | 5     | 5       | 0       | 7882.9344 | -0.0013   |
| 6    | 4      | 3      | 5     | 4       | 2       | 7891.4890 | 0.0152    |
| 6    | 4      | 2      | 5     | 4       | 1       | 7892.6993 | 0.0006    |
| 6    | 3      | 4      | 5     | 3       | 3       | 7896.6880 | -0.0088   |
| 6    | 3      | 3      | 5     | 3       | 2       | 7931.0826 | -0.0047   |
| 5    | 4      | 2      | 4     | 4       | 1       | 6570.4677 | 0.0492    |
| 5    | 4      | 1      | 4     | 4       | 0       | 6570.6938 | 0.0010    |
| 1    | 1      | 0      | 0     | 0       | 0       | 2072.4207 | -0.0038   |
| 2    | 1      | 1      | 1     | 0       | 1       | 3479.8919 | 0.0030    |
| 5    | 1      | 5      | 4     | 2       | 3       | 3619.0406 | -0.0042   |
| 4    | 0      | 4      | 3     | 1       | 2       | 4094.0834 | 0.0039    |
| 2    | 2      | 0      | 1     | 1       | 0       | 4722.0060 | 0.0017    |
| 2    | 2      | 1      | 1     | 1       | 1       | 4809.8049 | 0.0033    |
| 3    | 1      | 2      | 2     | 0       | 2       | 4939.6630 | 0.0044    |
| 6    | 0      | 6      | 5     | 1       | 4       | 5897.9277 | -0.0096   |
| 3    | 2      | 1      | 2     | 1       | 1       | 5973.2178 | -0.0026   |
| 3    | 2      | 2      | 2     | 1       | 2       | 6217.2561 | -0.0006   |
| 6    | 1      | 5      | 5     | 2       | 3       | 6276.9854 | 0.0059    |
| 4    | 1      | 3      | 3     | 0       | 3       | 6462.2136 | -0.0162   |
| 9    | 1      | 9      | 8     | 2       | 7       | 7180.3816 | -0.0001   |
| 4    | 2      | 2      | 3     | 1       | 2       | 7229.3200 | -0.0072   |
| 3    | 3      | 0      | 2     | 2       | 0       | 7494.8655 | 0.0050    |
| 3    | 3      | 1      | 2     | 2       | 1       | 7504.2335 | 0.0009    |
| 7    | 1      | 6      | 6     | 2       | 4       | 7530.9585 | -0.0035   |
| 9    | 2      | 8      | 8     | 3       | 6       | 7583.2758 | 0.0038    |
| 4    | 2      | 3      | 3     | 1       | 3       | 7671.7730 | 0.0040    |
| 8    | 2      | 6      | 7     | 3       | 4       | 7815.5739 | -0.0032   |
| 9    | 0      | 9      | 8     | 1       | 7       | 7880.2145 | 0.0000    |
| 3    | 2      | 1      | 3     | 1       | 3       | 2490.4014 | -0.0032   |
| 4    | 2      | 2      | 4     | 1       | 4       | 2790.8510 | 0.0075    |
| 6    | 2      | 4      | 6     | 1       | 6       | 3810.1664 | 0.0020    |
| 9    | 3      | 7      | 9     | 2       | 7       | 2246.6253 | 0.0161    |
| 8    | 3      | 6      | 8     | 2       | 6       | 2589.7937 | 0.0062    |
| 7    | 3      | 5      | 7     | 2       | 5       | 2893.7987 | 0.0017    |
| 5    | 3      | 3      | 5     | 2       | 3       | 3333.3172 | -0.0021   |
| 4    | 3      | 2      | 4     | 2       | 2       | 3457.5344 | 0.0039    |
| 3    | 3      | 0      | 3     | 2       | 2       | 3575.9359 | 0.0013    |
| 4    | 3      | 1      | 4     | 2       | 3       | 3605.8191 | -0.0009   |
| 5    | 3      | 2      | 5     | 2       | 4       | 3669.4792 | -0.0001   |
| 6    | 3      | 3      | 6     | 2       | 5       | 3787.4750 | 0.0014    |
| 7    | 3      | 4      | 7     | 2       | 6       | 3986.0954 | -0.0110   |
| 8    | 3      | 5      | 8     | 2       | 7       | 4295.3765 | -0.0031   |
| 10   | 4      | 7      | 10    | 3       | 7       | 4258.6744 | -0.0210   |
| 8    | 4      | 5      | 8     | 3       | 5       | 4718.6376 | 0.0037    |
| 7    | 4      | 4      | 7     | 3       | 4       | 4843.5266 | -0.0029   |
| 6    | 4      | 3      | 6     | 3       | 3       | 4917.3287 | 0.0017    |
| 5    | 4      | 2      | 5     | 3       | 2       | 4956.9272 | -0.0133   |

|    |   |   |    |   |   |           |         |
|----|---|---|----|---|---|-----------|---------|
| 6  | 4 | 2 | 6  | 3 | 4 | 4971.0070 | 0.0057  |
| 7  | 4 | 3 | 7  | 3 | 5 | 4974.9956 | -0.0012 |
| 5  | 4 | 1 | 5  | 3 | 3 | 4974.9956 | -0.0039 |
| 4  | 4 | 0 | 4  | 3 | 2 | 4980.6856 | 0.0035  |
| 8  | 4 | 4 | 8  | 3 | 6 | 4997.6152 | -0.0036 |
| 9  | 4 | 5 | 9  | 3 | 7 | 5054.7152 | 0.0023  |
| 9  | 5 | 5 | 9  | 4 | 5 | 6304.0903 | -0.0015 |
| 11 | 5 | 6 | 11 | 4 | 8 | 6319.9556 | 0.0083  |
| 10 | 5 | 5 | 10 | 4 | 7 | 6329.5118 | -0.0028 |
| 9  | 5 | 4 | 9  | 4 | 6 | 6347.3420 | -0.0014 |
| 7  | 5 | 3 | 7  | 4 | 3 | 6377.3542 | 0.0007  |
| 7  | 5 | 2 | 7  | 4 | 4 | 6383.0241 | -0.0004 |
| 6  | 5 | 2 | 6  | 4 | 2 | 6394.0678 | -0.0051 |
| 6  | 5 | 1 | 6  | 4 | 3 | 6395.6363 | 0.0115  |

---

**Table S9:** Line list for the fit obtained using the SPFIT program for *cis*-out-perp conformer, measured rotational transitions are shown as Obs. and the residuals are shown as Diff.

| $J'$ | $K'_a$ | $K'_c$ | $J''$ | $K''_a$ | $K''_c$ | Obs./MHz  | Diff./MHz |
|------|--------|--------|-------|---------|---------|-----------|-----------|
| 2    | 1      | 2      | 1     | 1       | 1       | 2516.1147 | -0.0044   |
| 2    | 1      | 1      | 1     | 1       | 0       | 2699.9533 | 0.0022    |
| 3    | 1      | 3      | 2     | 1       | 2       | 3768.9532 | -0.0025   |
| 3    | 0      | 3      | 2     | 0       | 2       | 3877.6416 | 0.0030    |
| 3    | 2      | 2      | 2     | 2       | 1       | 3912.0408 | -0.0031   |
| 3    | 2      | 1      | 2     | 2       | 0       | 3946.4622 | 0.0051    |
| 3    | 1      | 2      | 2     | 1       | 1       | 4044.1924 | 0.0098    |
| 4    | 1      | 4      | 3     | 1       | 3       | 5016.2256 | 0.0018    |
| 4    | 0      | 4      | 3     | 0       | 3       | 5133.1169 | -0.0014   |
| 4    | 2      | 3      | 3     | 2       | 2       | 5209.2453 | -0.0019   |
| 4    | 3      | 2      | 3     | 3       | 1       | 5232.0558 | 0.0105    |
| 4    | 3      | 1      | 3     | 3       | 0       | 5235.1528 | -0.0012   |
| 4    | 2      | 2      | 3     | 2       | 1       | 5292.1685 | 0.0015    |
| 4    | 1      | 3      | 3     | 1       | 2       | 5380.7841 | 0.0048    |
| 5    | 1      | 5      | 4     | 1       | 4       | 6257.1285 | -0.0083   |
| 5    | 0      | 5      | 4     | 0       | 4       | 6365.0753 | -0.0016   |
| 5    | 2      | 4      | 4     | 2       | 3       | 6500.6809 | 0.0104    |
| 5    | 3      | 3      | 4     | 3       | 2       | 6544.9634 | -0.0011   |
| 5    | 2      | 3      | 4     | 2       | 2       | 6655.4599 | 0.0003    |
| 5    | 1      | 4      | 4     | 1       | 3       | 6705.9626 | -0.0098   |
| 6    | 1      | 6      | 5     | 1       | 5       | 7491.6175 | 0.0046    |
| 6    | 0      | 6      | 5     | 0       | 5       | 7579.1450 | -0.0105   |
| 6    | 2      | 5      | 5     | 2       | 4       | 7785.0139 | -0.0001   |
| 6    | 3      | 4      | 5     | 3       | 3       | 7858.8274 | -0.0032   |
| 6    | 3      | 3      | 5     | 3       | 2       | 7886.7971 | -0.0118   |
| 2    | 1      | 2      | 1     | 0       | 1       | 3193.6974 | -0.0066   |
| 6    | 1      | 6      | 5     | 2       | 3       | 4322.6203 | 0.0058    |
| 3    | 1      | 3      | 2     | 0       | 2       | 4363.3506 | -0.0039   |
| 4    | 0      | 4      | 3     | 1       | 3       | 4647.4025 | 0.0002    |
| 2    | 2      | 1      | 1     | 1       | 0       | 4732.6911 | -0.0118   |
| 2    | 2      | 0      | 1     | 1       | 1       | 4833.3504 | 0.0003    |
| 4    | 1      | 4      | 3     | 0       | 3       | 5501.9385 | -0.0012   |
| 3    | 2      | 2      | 2     | 1       | 1       | 5944.7773 | -0.0183   |
| 5    | 0      | 5      | 4     | 1       | 4       | 5996.2588 | 0.0034    |
| 3    | 2      | 1      | 2     | 1       | 2       | 6263.6973 | 0.0092    |
| 6    | 1      | 5      | 5     | 2       | 4       | 6491.3420 | 0.0018    |
| 5    | 1      | 5      | 4     | 0       | 4       | 6625.9502 | -0.0080   |
| 6    | 0      | 6      | 5     | 1       | 5       | 7318.2857 | 0.0115    |
| 3    | 3      | 1      | 2     | 2       | 0       | 7526.2357 | 0.0002    |
| 3    | 3      | 0      | 2     | 2       | 1       | 7535.4809 | -0.0070   |
| 6    | 1      | 6      | 5     | 0       | 5       | 7752.4963 | 0.0020    |
| 4    | 2      | 2      | 3     | 1       | 3       | 7786.9203 | 0.0209    |
| 8    | 2      | 6      | 8     | 1       | 7       | 2117.4890 | 0.0045    |
| 5    | 2      | 4      | 5     | 1       | 5       | 2888.1504 | 0.0053    |
| 6    | 2      | 5      | 6     | 1       | 6       | 3181.5453 | -0.0009   |
| 4    | 3      | 2      | 4     | 2       | 3       | 3645.7207 | -0.0003   |
| 5    | 3      | 3      | 5     | 2       | 4       | 3690.0227 | 0.0078    |
| 7    | 3      | 5      | 7     | 2       | 6       | 3874.6779 | 0.0053    |
| 8    | 3      | 6      | 8     | 2       | 7       | 4028.8016 | -0.0068   |
| 9    | 3      | 7      | 9     | 2       | 8       | 4230.7246 | -0.0035   |
| 11   | 4      | 7      | 11    | 3       | 8       | 4270.5167 | -0.0017   |
| 9    | 4      | 5      | 9     | 3       | 6       | 4696.0281 | 0.0187    |
| 8    | 4      | 4      | 8     | 3       | 5       | 4841.4936 | 0.0078    |
| 7    | 4      | 4      | 7     | 3       | 5       | 5037.6626 | -0.0110   |
| 6    | 4      | 3      | 6     | 3       | 4       | 5039.3845 | 0.0120    |
| 8    | 4      | 4      | 8     | 3       | 6       | 5057.5554 | 0.0026    |
| 9    | 4      | 6      | 9     | 3       | 7       | 5069.0534 | -0.0210   |
| 7    | 6      | 1      | 7     | 5       | 2       | 7931.6898 | -0.0166   |
| 7    | 6      | 2      | 7     | 5       | 3       | 7931.7961 | 0.0149    |

**Table S10:** Line list for the fit obtained using the XIAM program for *cis*-in-perp conformer, measured rotational transitions are shown as Obs. and the residuals are shown as Diff.

| J' | K' <sub>a</sub> | K' <sub>c</sub> | J'' | K'' <sub>a</sub> | K'' <sub>c</sub> | Symm. | Obs./MHz  | Diff./MHz |
|----|-----------------|-----------------|-----|------------------|------------------|-------|-----------|-----------|
| 1  | 1               | 0               | 0   | 0                | 0                | A     | 2019.8957 | -0.0009   |
| 1  | 1               | 0               | 0   | 0                | 0                | E     | 2019.8957 | -0.0006   |
| 6  | 2               | 6               | 6   | 1                | 5                | A     | 2022.5574 | 0.0003    |
| 6  | 2               | 6               | 6   | 1                | 5                | E     | 2022.5574 | 0.0007    |
| 4  | 2               | 4               | 4   | 1                | 3                | A     | 2035.1088 | 0.0002    |
| 4  | 2               | 4               | 4   | 1                | 3                | E     | 2035.1088 | -0.0005   |
| 3  | 2               | 3               | 3   | 1                | 2                | A     | 2077.8513 | -0.0054   |
| 3  | 2               | 3               | 3   | 1                | 2                | E     | 2077.8513 | -0.0063   |
| 4  | 1               | 3               | 3   | 2                | 1                | A     | 2078.2844 | -0.0013   |
| 4  | 1               | 3               | 3   | 2                | 1                | E     | 2078.2844 | -0.0010   |
| 1  | 1               | 0               | 0   | 0                | 0                | A     | 2128.7481 | -0.0017   |
| 1  | 1               | 0               | 0   | 0                | 0                | E     | 2128.7481 | -0.0012   |
| 3  | 2               | 3               | 3   | 1                | 2                | A     | 2132.5369 | 0.0043    |
| 3  | 2               | 3               | 3   | 1                | 2                | E     | 2132.5369 | 0.0034    |
| 7  | 2               | 7               | 7   | 1                | 6                | A     | 2162.6566 | -0.0002   |
| 7  | 2               | 7               | 7   | 1                | 6                | E     | 2162.6566 | 0.0015    |
| 6  | 3               | 5               | 5   | 4                | 2                | A     | 2183.6638 | 0.0065    |
| 6  | 3               | 5               | 5   | 4                | 2                | E     | 2183.7072 | -0.0051   |
| 2  | 2               | 2               | 2   | 1                | 1                | A     | 2244.9148 | 0.0067    |
| 2  | 2               | 2               | 2   | 1                | 1                | E     | 2244.9148 | 0.0057    |
| 5  | 2               | 4               | 4   | 3                | 1                | A     | 2316.2274 | -0.0016   |
| 5  | 2               | 4               | 4   | 3                | 1                | E     | 2316.2274 | 0.0034    |
| 6  | 1               | 6               | 6   | 0                | 6                | A     | 2401.2643 | -0.0030   |
| 6  | 1               | 6               | 6   | 0                | 6                | E     | 2401.2643 | 0.0017    |
| 8  | 2               | 8               | 8   | 1                | 7                | A     | 2426.0314 | -0.0003   |
| 8  | 2               | 8               | 8   | 1                | 7                | E     | 2426.0314 | 0.0032    |
| 2  | 1               | 1               | 1   | 1                | 1                | A     | 2441.7165 | -0.0024   |
| 2  | 1               | 1               | 1   | 1                | 1                | E     | 2441.7165 | -0.0018   |
| 2  | 0               | 1               | 1   | 0                | 1                | A     | 2539.4933 | 0.0038    |
| 2  | 0               | 1               | 1   | 0                | 1                | E     | 2539.4933 | 0.0047    |
| 2  | 1               | 1               | 1   | 1                | 0                | A     | 2659.4259 | 0.0006    |
| 2  | 1               | 1               | 1   | 1                | 0                | E     | 2659.4259 | 0.0018    |
| 5  | 2               | 4               | 4   | 3                | 2                | A     | 2673.8168 | 0.0010    |
| 5  | 2               | 4               | 4   | 3                | 2                | E     | 2673.8168 | 0.0023    |
| 3  | 2               | 3               | 3   | 1                | 3                | A     | 2730.2669 | 0.0014    |
| 3  | 2               | 3               | 3   | 1                | 3                | E     | 2730.2669 | 0.0022    |
| 3  | 0               | 2               | 2   | 1                | 1                | A     | 2808.8588 | -0.0063   |
| 3  | 0               | 2               | 2   | 1                | 1                | E     | 2808.8588 | -0.0055   |
| 9  | 2               | 9               | 9   | 1                | 8                | A     | 2822.6073 | -0.0031   |
| 9  | 2               | 9               | 9   | 1                | 8                | E     | 2822.6073 | 0.0025    |
| 8  | 3               | 8               | 8   | 2                | 6                | A     | 2907.6618 | 0.0042    |
| 8  | 3               | 8               | 8   | 2                | 6                | E     | 2907.6618 | -0.0002   |
| 5  | 1               | 4               | 4   | 2                | 2                | A     | 2943.9093 | -0.0045   |
| 5  | 1               | 4               | 4   | 2                | 2                | E     | 2943.9093 | -0.0053   |
| 4  | 2               | 4               | 4   | 1                | 4                | A     | 2959.5135 | -0.0015   |
| 4  | 2               | 4               | 4   | 1                | 4                | E     | 2959.5135 | -0.0001   |
| 7  | 1               | 7               | 7   | 0                | 7                | A     | 3015.2416 | -0.0059   |
| 7  | 1               | 7               | 7   | 0                | 7                | E     | 3015.2416 | 0.0003    |
| 10 | 3               | 10              | 10  | 2                | 8                | A     | 3018.0417 | -0.0060   |
| 10 | 3               | 10              | 10  | 2                | 8                | E     | 3018.0417 | -0.0063   |
| 9  | 3               | 9               | 9   | 2                | 7                | A     | 3061.8296 | 0.0109    |
| 9  | 3               | 9               | 9   | 2                | 7                | E     | 3061.8296 | 0.0093    |
| 11 | 3               | 11              | 11  | 2                | 9                | A     | 3095.9666 | -0.0132   |
| 11 | 3               | 11              | 11  | 2                | 9                | E     | 3095.9666 | -0.0113   |
| 4  | 2               | 4               | 4   | 1                | 4                | A     | 3118.6952 | -0.0033   |
| 4  | 2               | 4               | 4   | 1                | 4                | E     | 3118.6952 | -0.0011   |
| 8  | 4               | 7               | 7   | 5                | 2                | A     | 3130.0999 | -0.0013   |
| 8  | 4               | 7               | 7   | 5                | 2                | E     | 3129.9510 | -0.0037   |
| 3  | 0               | 2               | 2   | 1                | 2                | A     | 3135.4230 | -0.0018   |
| 3  | 0               | 2               | 2   | 1                | 2                | E     | 3135.4230 | -0.0002   |
| 8  | 4               | 7               | 7   | 5                | 3                | A     | 3148.1828 | 0.0104    |
| 8  | 4               | 7               | 7   | 5                | 3                | E     | 3148.3097 | 0.0006    |
| 4  | 1               | 3               | 3   | 2                | 1                | A     | 3161.8723 | -0.0032   |
| 4  | 1               | 3               | 3   | 2                | 1                | E     | 3161.8723 | -0.0001   |
| 2  | 1               | 1               | 1   | 0                | 1                | A     | 3186.3268 | -0.0011   |
| 2  | 1               | 1               | 1   | 0                | 1                | E     | 3186.3268 | -0.0006   |
| 8  | 3               | 8               | 8   | 2                | 6                | A     | 3196.9323 | -0.0009   |
| 8  | 3               | 8               | 8   | 2                | 6                | E     | 3196.9323 | -0.0032   |
| 4  | 1               | 3               | 3   | 2                | 2                | A     | 3216.5496 | -0.0018   |
| 4  | 1               | 3               | 3   | 2                | 2                | E     | 3216.5496 | 0.0014    |
| 7  | 3               | 7               | 7   | 2                | 5                | A     | 3245.7720 | 0.0047    |
| 7  | 3               | 7               | 7   | 2                | 5                | E     | 3245.7720 | 0.0014    |
| 5  | 2               | 5               | 5   | 1                | 5                | A     | 3248.6737 | -0.0021   |

|    |   |    |    |   |    |   |           |         |
|----|---|----|----|---|----|---|-----------|---------|
| 5  | 2 | 5  | 5  | 1 | 5  | E | 3248.6737 | 0.0001  |
| 12 | 3 | 12 | 12 | 2 | 10 | A | 3316.2248 | 0.0045  |
| 12 | 3 | 12 | 12 | 2 | 10 | E | 3316.2248 | 0.0090  |
| 10 | 2 | 10 | 10 | 1 | 9  | A | 3349.6321 | 0.0018  |
| 10 | 2 | 10 | 10 | 1 | 9  | E | 3349.6321 | 0.0097  |
| 7  | 3 | 7  | 7  | 2 | 5  | A | 3384.3888 | 0.0020  |
| 7  | 3 | 7  | 7  | 2 | 5  | E | 3384.3888 | -0.0004 |
| 7  | 3 | 6  | 6  | 4 | 2  | A | 3416.2827 | 0.0156  |
| 7  | 3 | 6  | 6  | 4 | 2  | E | 3416.2373 | -0.0120 |
| 6  | 2 | 5  | 5  | 3 | 2  | A | 3496.1689 | -0.0031 |
| 6  | 2 | 5  | 5  | 3 | 2  | E | 3496.1689 | -0.0002 |
| 2  | 1 | 1  | 1  | 0 | 1  | A | 3512.8864 | -0.0012 |
| 2  | 1 | 1  | 1  | 0 | 1  | E | 3512.8864 | 0.0001  |
| 6  | 3 | 6  | 6  | 2 | 4  | A | 3524.5965 | -0.0045 |
| 6  | 3 | 6  | 6  | 2 | 4  | E | 3524.5965 | -0.0068 |
| 7  | 3 | 6  | 6  | 4 | 3  | A | 3556.5810 | 0.0169  |
| 7  | 3 | 6  | 6  | 4 | 3  | E | 3556.5810 | 0.0082  |
| 6  | 3 | 6  | 6  | 2 | 4  | A | 3581.9832 | 0.0005  |
| 6  | 3 | 6  | 6  | 2 | 4  | E | 3581.9832 | -0.0017 |
| 6  | 2 | 6  | 6  | 1 | 6  | A | 3596.6371 | -0.0010 |
| 6  | 2 | 6  | 6  | 1 | 6  | E | 3596.6371 | 0.0022  |
| 6  | 1 | 5  | 5  | 2 | 3  | A | 3652.8250 | -0.0053 |
| 6  | 1 | 5  | 5  | 2 | 3  | E | 3652.8250 | -0.0077 |
| 3  | 1 | 2  | 2  | 1 | 2  | A | 3655.9648 | -0.0014 |
| 3  | 1 | 2  | 2  | 1 | 2  | E | 3655.9648 | -0.0005 |
| 13 | 3 | 13 | 13 | 2 | 11 | A | 3689.1646 | -0.0103 |
| 13 | 3 | 13 | 13 | 2 | 11 | E | 3689.1646 | -0.0026 |
| 8  | 1 | 8  | 8  | 0 | 8  | A | 3691.5783 | -0.0031 |
| 8  | 1 | 8  | 8  | 0 | 8  | E | 3691.5783 | 0.0040  |
| 5  | 3 | 5  | 5  | 2 | 3  | A | 3753.2932 | -0.0031 |
| 5  | 3 | 5  | 5  | 2 | 3  | E | 3753.2932 | -0.0052 |
| 3  | 0 | 2  | 2  | 0 | 2  | A | 3782.2679 | 0.0047  |
| 3  | 0 | 2  | 2  | 0 | 2  | E | 3782.2679 | 0.0059  |
| 3  | 2 | 2  | 2  | 2 | 1  | A | 3825.8417 | -0.0061 |
| 3  | 2 | 2  | 2  | 2 | 1  | E | 3825.8417 | -0.0051 |
| 3  | 2 | 2  | 2  | 2 | 0  | A | 3869.4402 | 0.0003  |
| 3  | 2 | 2  | 2  | 2 | 0  | E | 3869.4402 | 0.0023  |
| 4  | 3 | 4  | 4  | 2 | 2  | A | 3871.4203 | -0.0005 |
| 4  | 3 | 4  | 4  | 2 | 2  | E | 3871.4203 | 0.0012  |
| 4  | 3 | 4  | 4  | 2 | 2  | A | 3876.3620 | 0.0014  |
| 4  | 3 | 4  | 4  | 2 | 2  | E | 3876.3620 | -0.0022 |
| 3  | 3 | 3  | 3  | 2 | 1  | A | 3947.8279 | 0.0188  |
| 3  | 3 | 3  | 3  | 2 | 1  | E | 3947.8279 | 0.0003  |
| 3  | 1 | 2  | 2  | 1 | 1  | A | 3981.8129 | -0.0024 |
| 3  | 1 | 2  | 2  | 1 | 1  | E | 3981.8129 | -0.0007 |
| 11 | 2 | 11 | 11 | 1 | 10 | A | 3987.9264 | -0.0153 |
| 11 | 2 | 11 | 11 | 1 | 10 | E | 3987.9264 | -0.0052 |
| 14 | 4 | 14 | 14 | 3 | 11 | A | 3996.7294 | 0.0006  |
| 14 | 4 | 14 | 14 | 3 | 11 | E | 3996.7294 | -0.0011 |
| 7  | 2 | 7  | 7  | 1 | 7  | A | 4000.1542 | -0.0018 |
| 7  | 2 | 7  | 7  | 1 | 7  | E | 4000.1542 | 0.0026  |
| 3  | 3 | 3  | 3  | 2 | 2  | A | 4001.7632 | -0.0119 |
| 3  | 3 | 3  | 3  | 2 | 2  | E | 4001.7632 | 0.0057  |
| 3  | 3 | 3  | 3  | 2 | 2  | A | 4002.5037 | 0.0187  |
| 3  | 3 | 3  | 3  | 2 | 2  | E | 4002.5037 | 0.0002  |
| 6  | 1 | 5  | 5  | 2 | 4  | A | 4005.4751 | -0.0024 |
| 6  | 1 | 5  | 5  | 2 | 4  | E | 4005.4751 | -0.0031 |
| 15 | 4 | 15 | 15 | 3 | 12 | A | 4006.6981 | 0.0028  |
| 15 | 4 | 15 | 15 | 3 | 12 | E | 4006.6981 | 0.0040  |
| 4  | 3 | 4  | 4  | 2 | 3  | A | 4030.6035 | -0.0008 |
| 4  | 3 | 4  | 4  | 2 | 3  | E | 4030.6035 | 0.0016  |
| 4  | 3 | 4  | 4  | 2 | 3  | A | 4035.5515 | 0.0074  |
| 4  | 3 | 4  | 4  | 2 | 3  | E | 4035.5515 | 0.0046  |
| 5  | 3 | 5  | 5  | 2 | 4  | A | 4086.4105 | -0.0034 |
| 5  | 3 | 5  | 5  | 2 | 4  | E | 4086.4105 | -0.0026 |
| 5  | 3 | 5  | 5  | 2 | 4  | A | 4105.9442 | 0.0008  |
| 5  | 3 | 5  | 5  | 2 | 4  | E | 4105.9442 | 0.0004  |
| 13 | 4 | 13 | 13 | 3 | 10 | A | 4119.2966 | 0.0098  |
| 13 | 4 | 13 | 13 | 3 | 10 | E | 4119.2966 | 0.0061  |
| 10 | 5 | 9  | 9  | 6 | 3  | A | 4122.2482 | -0.0021 |
| 10 | 5 | 9  | 9  | 6 | 4  | A | 4127.4985 | -0.0021 |
| 10 | 5 | 9  | 9  | 6 | 4  | E | 4127.7132 | 0.0012  |
| 6  | 2 | 5  | 5  | 3 | 2  | A | 4150.5877 | -0.0055 |
| 6  | 2 | 5  | 5  | 3 | 2  | E | 4150.5877 | 0.0004  |
| 6  | 2 | 5  | 5  | 3 | 3  | A | 4170.1252 | 0.0024  |
| 6  | 2 | 5  | 5  | 3 | 3  | E | 4170.1252 | 0.0072  |
| 6  | 3 | 6  | 6  | 2 | 5  | A | 4179.0181 | -0.0041 |

|    |   |    |    |   |    |   |           |         |
|----|---|----|----|---|----|---|-----------|---------|
| 6  | 3 | 6  | 6  | 2 | 5  | E | 4179.0181 | -0.0033 |
| 7  | 1 | 6  | 6  | 2 | 4  | A | 4187.5877 | -0.0035 |
| 7  | 1 | 6  | 6  | 2 | 4  | E | 4187.5877 | -0.0081 |
| 14 | 3 | 14 | 14 | 2 | 12 | A | 4212.0998 | -0.0020 |
| 14 | 3 | 14 | 14 | 2 | 12 | E | 4212.0998 | 0.0090  |
| 6  | 3 | 6  | 6  | 2 | 5  | A | 4236.3966 | -0.0073 |
| 6  | 3 | 6  | 6  | 2 | 5  | E | 4236.3966 | -0.0065 |
| 6  | 2 | 6  | 6  | 1 | 6  | A | 4251.0537 | -0.0055 |
| 6  | 2 | 6  | 6  | 1 | 6  | E | 4251.0537 | 0.0007  |
| 3  | 1 | 2  | 2  | 0 | 2  | A | 4302.8006 | -0.0040 |
| 3  | 1 | 2  | 2  | 0 | 2  | E | 4302.8006 | -0.0035 |
| 7  | 3 | 7  | 7  | 2 | 6  | A | 4317.3961 | 0.0017  |
| 7  | 3 | 7  | 7  | 2 | 6  | E | 4317.3961 | 0.0031  |
| 12 | 4 | 12 | 12 | 3 | 9  | A | 4337.6892 | 0.0045  |
| 12 | 4 | 12 | 12 | 3 | 9  | E | 4337.6892 | -0.0003 |
| 9  | 1 | 9  | 9  | 0 | 9  | A | 4396.2484 | -0.0070 |
| 9  | 1 | 9  | 9  | 0 | 9  | E | 4396.2484 | 0.0004  |
| 11 | 4 | 11 | 11 | 3 | 8  | A | 4397.0539 | 0.0026  |
| 11 | 4 | 11 | 11 | 3 | 8  | E | 4397.0539 | -0.0041 |
| 9  | 4 | 8  | 8  | 5 | 3  | A | 4445.8197 | -0.0024 |
| 9  | 4 | 8  | 8  | 5 | 3  | E | 4445.7475 | -0.0054 |
| 8  | 2 | 8  | 8  | 1 | 8  | A | 4453.8230 | -0.0016 |
| 8  | 2 | 8  | 8  | 1 | 8  | E | 4453.8230 | 0.0044  |
| 7  | 3 | 7  | 7  | 2 | 6  | A | 4456.0175 | 0.0036  |
| 7  | 3 | 7  | 7  | 2 | 6  | E | 4456.0175 | 0.0058  |
| 4  | 0 | 3  | 3  | 1 | 3  | A | 4476.0424 | -0.0025 |
| 4  | 0 | 3  | 3  | 1 | 3  | E | 4476.0424 | -0.0005 |
| 9  | 4 | 8  | 8  | 5 | 4  | A | 4491.8784 | -0.0124 |
| 9  | 4 | 8  | 8  | 5 | 4  | E | 4491.9336 | -0.0149 |
| 8  | 3 | 8  | 8  | 2 | 7  | A | 4508.7517 | 0.0000  |
| 8  | 3 | 8  | 8  | 2 | 7  | E | 4508.7517 | 0.0021  |
| 8  | 1 | 7  | 7  | 2 | 5  | A | 4545.5989 | 0.0078  |
| 8  | 1 | 7  | 7  | 2 | 5  | E | 4545.5989 | 0.0002  |
| 5  | 1 | 4  | 4  | 2 | 2  | A | 4557.1749 | 0.0007  |
| 5  | 1 | 4  | 4  | 2 | 2  | E | 4557.1749 | 0.0042  |
| 7  | 2 | 6  | 6  | 3 | 3  | A | 4605.7629 | -0.0015 |
| 7  | 2 | 6  | 6  | 3 | 3  | E | 4605.7629 | 0.0005  |
| 11 | 4 | 11 | 11 | 3 | 8  | A | 4606.6703 | 0.0068  |
| 11 | 4 | 11 | 11 | 3 | 8  | E | 4606.6703 | 0.0019  |
| 8  | 3 | 7  | 7  | 4 | 3  | A | 4693.9085 | 0.0024  |
| 8  | 3 | 7  | 7  | 4 | 3  | E | 4693.9085 | 0.0105  |
| 8  | 3 | 7  | 7  | 4 | 4  | A | 4699.9884 | -0.0017 |
| 8  | 3 | 7  | 7  | 4 | 4  | E | 4699.9884 | -0.0011 |
| 11 | 1 | 10 | 10 | 2 | 8  | A | 4701.1428 | 0.0212  |
| 11 | 1 | 10 | 10 | 2 | 8  | E | 4701.1428 | -0.0022 |
| 12 | 2 | 12 | 12 | 1 | 11 | A | 4704.4351 | -0.0035 |
| 12 | 2 | 12 | 12 | 1 | 11 | E | 4704.4351 | 0.0082  |
| 5  | 0 | 4  | 4  | 1 | 3  | A | 4711.8573 | -0.0073 |
| 5  | 0 | 4  | 4  | 1 | 3  | E | 4711.8573 | -0.0078 |
| 5  | 1 | 4  | 4  | 2 | 3  | A | 4716.3585 | 0.0009  |
| 5  | 1 | 4  | 4  | 2 | 3  | E | 4716.3585 | 0.0051  |
| 9  | 1 | 8  | 8  | 2 | 6  | A | 4736.8302 | 0.0147  |
| 9  | 1 | 8  | 8  | 2 | 6  | E | 4736.8302 | 0.0035  |
| 9  | 3 | 9  | 9  | 2 | 8  | A | 4757.9047 | -0.0012 |
| 9  | 3 | 9  | 9  | 2 | 8  | E | 4757.9047 | 0.0020  |
| 8  | 3 | 8  | 8  | 2 | 7  | A | 4798.0216 | -0.0058 |
| 8  | 3 | 8  | 8  | 2 | 7  | E | 4798.0216 | -0.0016 |
| 7  | 1 | 6  | 6  | 2 | 5  | A | 4842.0117 | -0.0007 |
| 7  | 1 | 6  | 6  | 2 | 5  | E | 4842.0117 | -0.0024 |
| 4  | 1 | 3  | 3  | 1 | 3  | A | 4863.2261 | -0.0011 |
| 4  | 1 | 3  | 3  | 1 | 3  | E | 4863.2261 | 0.0000  |
| 15 | 3 | 15 | 15 | 2 | 13 | A | 4865.8176 | -0.0053 |
| 15 | 3 | 15 | 15 | 2 | 13 | E | 4865.8176 | 0.0088  |
| 10 | 4 | 10 | 10 | 3 | 7  | A | 4879.8257 | -0.0005 |
| 10 | 4 | 10 | 10 | 3 | 7  | E | 4879.8257 | -0.0049 |
| 2  | 2 | 1  | 1  | 1 | 0  | A | 4893.2482 | -0.0013 |
| 2  | 2 | 1  | 1  | 1 | 0  | E | 4893.2482 | -0.0002 |
| 2  | 2 | 1  | 1  | 1 | 0  | A | 4904.3426 | 0.0093  |
| 2  | 2 | 1  | 1  | 1 | 0  | E | 4904.3426 | 0.0094  |
| 19 | 5 | 19 | 19 | 4 | 15 | A | 4911.3012 | 0.0073  |
| 19 | 5 | 19 | 19 | 4 | 15 | E | 4911.3012 | 0.0071  |
| 9  | 2 | 9  | 9  | 1 | 9  | A | 4950.5300 | -0.0043 |
| 9  | 2 | 9  | 9  | 1 | 9  | E | 4950.5300 | 0.0036  |
| 3  | 1 | 2  | 2  | 0 | 2  | A | 4955.2038 | -0.0095 |
| 3  | 1 | 2  | 2  | 0 | 2  | E | 4955.2038 | -0.0074 |
| 18 | 5 | 18 | 18 | 4 | 14 | A | 4974.6658 | 0.0031  |
| 18 | 5 | 18 | 18 | 4 | 14 | E | 4974.6658 | -0.0011 |

|    |   |    |    |   |    |   |           |         |
|----|---|----|----|---|----|---|-----------|---------|
| 8  | 3 | 7  | 7  | 4 | 4  | A | 4989.2646 | -0.0012 |
| 8  | 3 | 7  | 7  | 4 | 4  | E | 4989.2646 | 0.0014  |
| 4  | 0 | 3  | 3  | 0 | 3  | A | 4996.5749 | -0.0114 |
| 4  | 0 | 3  | 3  | 0 | 3  | E | 4996.5749 | -0.0100 |
| 2  | 2 | 1  | 1  | 1 | 1  | A | 5013.1965 | 0.0099  |
| 2  | 2 | 1  | 1  | 1 | 1  | E | 5013.1965 | 0.0102  |
| 10 | 3 | 10 | 10 | 2 | 9  | A | 5066.8451 | 0.0036  |
| 10 | 3 | 10 | 10 | 2 | 9  | E | 5066.8451 | 0.0080  |
| 9  | 4 | 9  | 9  | 3 | 6  | A | 5073.8270 | 0.0076  |
| 9  | 4 | 9  | 9  | 3 | 6  | E | 5073.8270 | 0.0044  |
| 4  | 2 | 3  | 3  | 2 | 2  | A | 5092.4746 | -0.0020 |
| 4  | 2 | 3  | 3  | 2 | 2  | E | 5092.4746 | -0.0003 |
| 10 | 1 | 10 | 10 | 0 | 10 | A | 5101.6937 | -0.0015 |
| 10 | 1 | 10 | 10 | 0 | 10 | E | 5101.6937 | 0.0049  |
| 12 | 6 | 11 | 11 | 7 | 4  | A | 5110.7185 | -0.0028 |
| 12 | 6 | 11 | 11 | 7 | 4  | E | 5110.4058 | -0.0124 |
| 12 | 6 | 11 | 11 | 7 | 5  | A | 5112.1809 | 0.0021  |
| 12 | 6 | 11 | 11 | 7 | 5  | E | 5112.4577 | -0.0092 |
| 9  | 4 | 9  | 9  | 3 | 6  | A | 5119.3669 | -0.0121 |
| 9  | 4 | 9  | 9  | 3 | 6  | E | 5119.3669 | -0.0157 |
| 4  | 3 | 3  | 3  | 3 | 1  | A | 5121.3132 | 0.0074  |
| 4  | 3 | 3  | 3  | 3 | 1  | E | 5121.3132 | -0.0061 |
| 4  | 3 | 3  | 3  | 3 | 0  | A | 5125.5311 | -0.0046 |
| 4  | 3 | 3  | 3  | 3 | 0  | E | 5125.5311 | 0.0128  |
| 17 | 5 | 17 | 17 | 4 | 13 | A | 5177.0016 | -0.0017 |
| 17 | 5 | 17 | 17 | 4 | 13 | E | 5177.0016 | -0.0084 |
| 4  | 2 | 3  | 3  | 2 | 1  | A | 5196.9813 | -0.0029 |
| 4  | 2 | 3  | 3  | 2 | 1  | E | 5196.9813 | -0.0005 |
| 8  | 4 | 8  | 8  | 3 | 5  | A | 5285.9113 | -0.0007 |
| 8  | 4 | 8  | 8  | 3 | 5  | E | 5285.9113 | -0.0018 |
| 9  | 3 | 9  | 9  | 2 | 8  | A | 5294.1543 | -0.0265 |
| 9  | 3 | 9  | 9  | 2 | 8  | E | 5294.1543 | -0.0196 |
| 4  | 1 | 3  | 3  | 1 | 2  | A | 5294.4069 | -0.0013 |
| 4  | 1 | 3  | 3  | 1 | 2  | E | 5294.4069 | 0.0010  |
| 8  | 4 | 8  | 8  | 3 | 5  | A | 5303.8702 | 0.0053  |
| 8  | 4 | 8  | 8  | 3 | 5  | E | 5303.8702 | 0.0018  |
| 4  | 1 | 3  | 3  | 0 | 3  | A | 5383.7664 | -0.0021 |
| 4  | 1 | 3  | 3  | 0 | 3  | E | 5383.7664 | -0.0017 |
| 7  | 4 | 7  | 7  | 3 | 4  | A | 5429.8799 | 0.0053  |
| 7  | 4 | 7  | 7  | 3 | 4  | E | 5429.8799 | 0.0001  |
| 11 | 3 | 11 | 11 | 2 | 10 | A | 5434.5713 | -0.0018 |
| 11 | 3 | 11 | 11 | 2 | 10 | E | 5434.5713 | 0.0041  |
| 11 | 5 | 10 | 10 | 6 | 4  | A | 5446.5551 | -0.0099 |
| 11 | 5 | 10 | 10 | 6 | 5  | A | 5460.3647 | 0.0228  |
| 13 | 2 | 13 | 13 | 1 | 12 | A | 5460.3647 | 0.0129  |
| 13 | 2 | 13 | 13 | 1 | 12 | E | 5460.3647 | 0.0256  |
| 6  | 0 | 5  | 5  | 1 | 4  | A | 5468.1349 | 0.0072  |
| 6  | 0 | 5  | 5  | 1 | 4  | E | 5468.1349 | 0.0055  |
| 16 | 5 | 16 | 16 | 4 | 12 | A | 5475.2214 | -0.0037 |
| 16 | 5 | 16 | 16 | 4 | 12 | E | 5475.2214 | -0.0116 |
| 10 | 2 | 10 | 10 | 1 | 10 | A | 5482.2591 | -0.0047 |
| 10 | 2 | 10 | 10 | 1 | 10 | E | 5482.2591 | 0.0063  |
| 6  | 4 | 6  | 6  | 3 | 3  | A | 5506.8924 | 0.0006  |
| 6  | 4 | 6  | 6  | 3 | 3  | E | 5506.8924 | -0.0139 |
| 5  | 4 | 5  | 5  | 3 | 2  | E | 5548.8573 | -0.0027 |
| 5  | 4 | 5  | 5  | 3 | 2  | A | 5549.2692 | 0.0128  |
| 5  | 4 | 5  | 5  | 3 | 2  | E | 5549.3131 | -0.0021 |
| 7  | 4 | 7  | 7  | 3 | 5  | A | 5562.4151 | 0.0051  |
| 7  | 4 | 7  | 7  | 3 | 5  | E | 5562.4151 | 0.0083  |
| 6  | 4 | 6  | 6  | 3 | 4  | A | 5562.5949 | -0.0011 |
| 6  | 4 | 6  | 6  | 3 | 4  | E | 5562.5949 | 0.0118  |
| 5  | 4 | 5  | 5  | 3 | 3  | A | 5568.4415 | -0.0067 |
| 5  | 4 | 5  | 5  | 3 | 3  | E | 5568.3934 | 0.0028  |
| 4  | 4 | 4  | 4  | 3 | 1  | A | 5570.1620 | -0.0007 |
| 4  | 4 | 4  | 4  | 3 | 1  | E | 5570.2912 | -0.0046 |
| 4  | 4 | 4  | 4  | 3 | 2  | A | 5575.0611 | -0.0037 |
| 4  | 4 | 4  | 4  | 3 | 2  | E | 5574.9287 | -0.0041 |
| 8  | 4 | 8  | 8  | 3 | 6  | A | 5575.1952 | 0.0076  |
| 8  | 4 | 8  | 8  | 3 | 6  | E | 5575.1952 | 0.0085  |
| 8  | 4 | 8  | 8  | 3 | 6  | A | 5593.1513 | 0.0108  |
| 8  | 4 | 8  | 8  | 3 | 6  | E | 5593.1513 | 0.0093  |
| 9  | 4 | 9  | 9  | 3 | 7  | A | 5610.0911 | -0.0032 |
| 9  | 4 | 9  | 9  | 3 | 7  | E | 5610.0911 | -0.0027 |
| 8  | 2 | 7  | 7  | 3 | 4  | A | 5615.0282 | -0.0007 |
| 8  | 2 | 7  | 7  | 3 | 4  | E | 5615.0282 | 0.0001  |
| 16 | 3 | 16 | 16 | 2 | 14 | A | 5615.8259 | -0.0295 |
| 16 | 3 | 16 | 16 | 2 | 14 | E | 5615.8259 | -0.0129 |



|    |   |    |    |   |    |   |           |         |
|----|---|----|----|---|----|---|-----------|---------|
| 8  | 1 | 7  | 7  | 2 | 6  | A | 5617.2178 | -0.0004 |
| 8  | 1 | 7  | 7  | 2 | 6  | E | 5617.2178 | -0.0033 |
| 10 | 4 | 10 | 10 | 3 | 8  | A | 5677.2291 | 0.0001  |
| 10 | 4 | 10 | 10 | 3 | 8  | E | 5677.2291 | 0.0010  |
| 7  | 2 | 6  | 6  | 3 | 3  | A | 5677.3940 | 0.0024  |
| 7  | 2 | 6  | 6  | 3 | 3  | E | 5677.3940 | 0.0091  |
| 7  | 2 | 6  | 6  | 3 | 4  | A | 5734.7742 | 0.0009  |
| 7  | 2 | 6  | 6  | 3 | 4  | E | 5734.7742 | 0.0075  |
| 10 | 4 | 9  | 9  | 5 | 4  | A | 5765.3921 | 0.0192  |
| 10 | 4 | 9  | 9  | 5 | 4  | E | 5765.3414 | -0.0050 |
| 11 | 4 | 11 | 11 | 3 | 9  | A | 5786.4978 | 0.0009  |
| 11 | 4 | 11 | 11 | 3 | 9  | E | 5786.4978 | 0.0024  |
| 11 | 1 | 11 | 11 | 0 | 11 | A | 5792.1974 | 0.0045  |
| 11 | 1 | 11 | 11 | 0 | 11 | E | 5792.1974 | 0.0074  |
| 5  | 0 | 4  | 4  | 1 | 4  | A | 5795.4563 | 0.0019  |
| 5  | 0 | 4  | 4  | 1 | 4  | E | 5795.4563 | 0.0042  |
| 15 | 5 | 15 | 15 | 4 | 11 | A | 5818.6865 | -0.0058 |
| 15 | 5 | 15 | 15 | 4 | 11 | E | 5818.6865 | -0.0138 |
| 12 | 3 | 12 | 12 | 2 | 11 | A | 5857.3255 | 0.0086  |
| 12 | 3 | 12 | 12 | 2 | 11 | E | 5857.3255 | 0.0161  |
| 10 | 4 | 9  | 9  | 5 | 5  | A | 5869.8355 | 0.0132  |
| 10 | 4 | 9  | 9  | 5 | 5  | E | 5869.8355 | 0.0001  |
| 6  | 1 | 5  | 5  | 2 | 3  | A | 5881.3360 | 0.0035  |
| 6  | 1 | 5  | 5  | 2 | 3  | E | 5881.3360 | 0.0069  |
| 9  | 3 | 8  | 8  | 4 | 4  | A | 5944.4489 | -0.0086 |
| 9  | 3 | 8  | 8  | 4 | 4  | E | 5944.4489 | -0.0030 |
| 12 | 4 | 12 | 12 | 3 | 10 | A | 5946.5173 | 0.0074  |
| 12 | 4 | 12 | 12 | 3 | 10 | E | 5946.5173 | 0.0100  |
| 9  | 3 | 8  | 8  | 4 | 5  | A | 5962.4079 | -0.0024 |
| 9  | 3 | 8  | 8  | 4 | 5  | E | 5962.4079 | 0.0008  |
| 11 | 4 | 11 | 11 | 3 | 9  | A | 5996.1162 | 0.0070  |
| 11 | 4 | 11 | 11 | 3 | 9  | E | 5996.1162 | 0.0104  |
| 11 | 2 | 11 | 11 | 1 | 11 | A | 6040.9650 | -0.0075 |
| 11 | 2 | 11 | 11 | 1 | 11 | E | 6040.9650 | 0.0088  |
| 3  | 2 | 2  | 2  | 1 | 1  | A | 6059.6670 | -0.0051 |
| 3  | 2 | 2  | 2  | 1 | 1  | E | 6059.6670 | -0.0042 |
| 5  | 1 | 4  | 4  | 1 | 4  | A | 6062.6110 | -0.0013 |
| 5  | 1 | 4  | 4  | 1 | 4  | E | 6062.6110 | 0.0000  |
| 7  | 0 | 6  | 6  | 1 | 5  | A | 6104.0310 | 0.0039  |
| 7  | 0 | 6  | 6  | 1 | 5  | E | 6104.0310 | 0.0009  |
| 3  | 2 | 2  | 2  | 1 | 1  | A | 6114.3419 | -0.0061 |
| 3  | 2 | 2  | 2  | 1 | 1  | E | 6114.3419 | -0.0051 |
| 14 | 5 | 14 | 14 | 4 | 10 | A | 6158.2334 | 0.0074  |
| 14 | 5 | 14 | 14 | 4 | 10 | E | 6158.2334 | 0.0003  |
| 13 | 4 | 13 | 13 | 3 | 11 | A | 6163.6748 | -0.0065 |
| 13 | 4 | 13 | 13 | 3 | 11 | E | 6163.6748 | -0.0025 |
| 5  | 0 | 4  | 4  | 0 | 4  | A | 6182.6342 | -0.0025 |
| 5  | 0 | 4  | 4  | 0 | 4  | E | 6182.6342 | -0.0011 |
| 14 | 2 | 14 | 14 | 1 | 13 | A | 6221.4289 | -0.0023 |
| 14 | 2 | 14 | 14 | 1 | 13 | E | 6221.4289 | 0.0104  |
| 6  | 1 | 5  | 5  | 2 | 4  | A | 6233.9612 | -0.0184 |
| 6  | 1 | 5  | 5  | 2 | 4  | E | 6233.9612 | -0.0133 |
| 13 | 3 | 13 | 13 | 2 | 12 | A | 6328.9923 | -0.0012 |
| 13 | 3 | 13 | 13 | 2 | 12 | E | 6328.9923 | 0.0082  |
| 9  | 1 | 8  | 8  | 2 | 7  | A | 6337.9098 | 0.0003  |
| 9  | 1 | 8  | 8  | 2 | 7  | E | 6337.9098 | -0.0045 |
| 5  | 2 | 4  | 4  | 2 | 3  | A | 6351.7760 | 0.0029  |
| 5  | 2 | 4  | 4  | 2 | 3  | E | 6351.7760 | 0.0051  |
| 3  | 2 | 2  | 2  | 1 | 2  | A | 6386.2347 | 0.0029  |
| 3  | 2 | 2  | 2  | 1 | 2  | E | 6386.2347 | 0.0046  |
| 5  | 4 | 4  | 4  | 4 | 1  | A | 6400.9596 | -0.0064 |
| 5  | 4 | 4  | 4  | 4 | 1  | E | 6401.0376 | -0.0025 |
| 5  | 4 | 4  | 4  | 4 | 0  | A | 6401.2665 | 0.0004  |
| 5  | 4 | 4  | 4  | 4 | 0  | E | 6401.1823 | -0.0050 |
| 5  | 3 | 4  | 4  | 3 | 2  | A | 6407.5867 | 0.0040  |
| 5  | 3 | 4  | 4  | 3 | 2  | E | 6407.5867 | 0.0045  |
| 5  | 3 | 4  | 4  | 3 | 1  | A | 6422.1643 | -0.0080 |
| 5  | 3 | 4  | 4  | 3 | 1  | E | 6422.1643 | -0.0035 |
| 13 | 6 | 12 | 12 | 7 | 5  | A | 6437.6179 | 0.0048  |
| 3  | 2 | 2  | 2  | 1 | 2  | A | 6440.9065 | -0.0012 |
| 3  | 2 | 2  | 2  | 1 | 2  | E | 6440.9065 | 0.0006  |
| 13 | 6 | 12 | 12 | 7 | 6  | A | 6441.5113 | -0.0017 |
| 14 | 4 | 14 | 14 | 3 | 12 | A | 6441.6075 | -0.0031 |
| 14 | 4 | 14 | 14 | 3 | 12 | E | 6441.6075 | 0.0024  |
| 5  | 1 | 4  | 4  | 0 | 4  | A | 6449.7942 | -0.0004 |
| 5  | 1 | 4  | 4  | 0 | 4  | E | 6449.7942 | 0.0001  |
| 13 | 5 | 13 | 13 | 4 | 9  | A | 6456.0543 | -0.0161 |

|    |   |    |    |   |    |   |           |         |
|----|---|----|----|---|----|---|-----------|---------|
| 13 | 5 | 13 | 13 | 4 | 9  | E | 6456.0543 | -0.0220 |
| 12 | 1 | 12 | 12 | 0 | 12 | A | 6463.0911 | 0.0157  |
| 12 | 1 | 12 | 12 | 0 | 12 | E | 6463.0911 | 0.0100  |
| 4  | 1 | 3  | 3  | 0 | 3  | A | 6467.3634 | 0.0049  |
| 4  | 1 | 3  | 3  | 0 | 3  | E | 6467.3634 | 0.0082  |
| 9  | 2 | 8  | 8  | 3 | 5  | A | 6490.4228 | 0.0063  |
| 9  | 2 | 8  | 8  | 3 | 5  | E | 6490.4228 | 0.0053  |
| 9  | 3 | 8  | 8  | 4 | 5  | A | 6498.6875 | 0.0023  |
| 9  | 3 | 8  | 8  | 4 | 5  | E | 6498.6875 | 0.0093  |
| 5  | 2 | 4  | 4  | 2 | 2  | A | 6545.2421 | 0.0054  |
| 5  | 2 | 4  | 4  | 2 | 2  | E | 6545.2421 | 0.0085  |
| 5  | 1 | 4  | 4  | 1 | 3  | A | 6592.2835 | 0.0007  |
| 5  | 1 | 4  | 4  | 1 | 3  | E | 6592.2835 | 0.0034  |
| 12 | 2 | 12 | 12 | 1 | 12 | A | 6619.3518 | -0.0067 |
| 12 | 2 | 12 | 12 | 1 | 12 | E | 6619.3518 | 0.0197  |
| 8  | 0 | 7  | 7  | 1 | 6  | A | 6645.5420 | -0.0115 |
| 8  | 0 | 7  | 7  | 1 | 6  | E | 6645.5420 | -0.0155 |
| 12 | 5 | 12 | 12 | 4 | 8  | A | 6692.3485 | 0.0122  |
| 12 | 5 | 12 | 12 | 4 | 8  | E | 6692.3485 | 0.0071  |
| 9  | 2 | 8  | 8  | 3 | 6  | A | 6779.6878 | -0.0043 |
| 9  | 2 | 8  | 8  | 3 | 6  | E | 6779.6878 | -0.0033 |
| 12 | 5 | 11 | 11 | 6 | 5  | A | 6780.3761 | 0.0013  |
| 12 | 5 | 11 | 11 | 6 | 5  | E | 6780.2730 | -0.0037 |
| 15 | 4 | 15 | 15 | 3 | 13 | A | 6780.8011 | 0.0025  |
| 15 | 4 | 15 | 15 | 3 | 13 | E | 6780.8011 | 0.0098  |
| 13 | 4 | 13 | 13 | 3 | 11 | A | 6841.4284 | -0.0127 |
| 13 | 4 | 13 | 13 | 3 | 11 | E | 6841.4284 | -0.0027 |
| 14 | 3 | 14 | 14 | 2 | 13 | A | 6841.9987 | -0.0041 |
| 14 | 3 | 14 | 14 | 2 | 13 | E | 6841.9987 | 0.0076  |
| 11 | 5 | 11 | 11 | 4 | 7  | A | 6864.7828 | 0.0013  |
| 11 | 5 | 11 | 11 | 4 | 7  | E | 6864.7828 | -0.0040 |
| 10 | 5 | 10 | 10 | 4 | 6  | A | 6982.7721 | -0.0098 |
| 10 | 5 | 10 | 10 | 4 | 6  | E | 6982.8071 | 0.0166  |
| 10 | 1 | 9  | 9  | 2 | 8  | A | 7012.4881 | 0.0020  |
| 10 | 1 | 9  | 9  | 2 | 8  | E | 7012.4881 | -0.0057 |
| 12 | 5 | 12 | 12 | 4 | 9  | A | 7052.2776 | 0.0010  |
| 12 | 5 | 12 | 12 | 4 | 9  | E | 7052.2776 | 0.0014  |
| 9  | 5 | 9  | 9  | 4 | 5  | A | 7058.0993 | -0.0251 |
| 9  | 5 | 9  | 9  | 4 | 5  | E | 7058.0993 | -0.0059 |
| 9  | 5 | 9  | 9  | 4 | 5  | A | 7059.8715 | -0.0163 |
| 9  | 5 | 9  | 9  | 4 | 5  | E | 7059.9120 | 0.0032  |
| 11 | 5 | 11 | 11 | 4 | 8  | A | 7060.7624 | 0.0004  |
| 11 | 5 | 11 | 11 | 4 | 8  | E | 7060.7624 | 0.0019  |
| 13 | 5 | 13 | 13 | 4 | 10 | A | 7063.7302 | 0.0007  |
| 13 | 5 | 13 | 13 | 4 | 10 | E | 7063.7302 | 0.0008  |
| 10 | 5 | 10 | 10 | 4 | 7  | A | 7080.2649 | 0.0106  |
| 10 | 5 | 10 | 10 | 4 | 7  | E | 7080.2649 | 0.0162  |
| 6  | 0 | 5  | 5  | 1 | 5  | A | 7081.3854 | -0.0027 |
| 6  | 0 | 5  | 5  | 1 | 5  | E | 7081.3854 | -0.0002 |
| 11 | 4 | 10 | 10 | 5 | 5  | A | 7082.4793 | -0.0290 |
| 11 | 4 | 10 | 10 | 5 | 5  | E | 7082.4793 | -0.0155 |
| 7  | 1 | 6  | 6  | 2 | 4  | A | 7096.7089 | -0.0086 |
| 7  | 1 | 6  | 6  | 2 | 4  | E | 7096.7089 | -0.0059 |
| 9  | 5 | 9  | 9  | 4 | 6  | A | 7103.6751 | -0.0089 |
| 9  | 5 | 9  | 9  | 4 | 6  | E | 7103.6751 | 0.0097  |
| 14 | 5 | 14 | 14 | 4 | 11 | A | 7105.1948 | 0.0009  |
| 14 | 5 | 14 | 14 | 4 | 11 | E | 7105.1948 | 0.0015  |
| 13 | 1 | 13 | 13 | 0 | 13 | A | 7116.2136 | 0.0087  |
| 13 | 1 | 13 | 13 | 0 | 13 | E | 7116.2136 | -0.0163 |
| 8  | 5 | 8  | 8  | 4 | 4  | E | 7108.1509 | -0.0063 |
| 8  | 5 | 8  | 8  | 4 | 4  | A | 7108.2202 | -0.0004 |
| 8  | 5 | 8  | 8  | 4 | 4  | A | 7108.7229 | -0.0068 |
| 8  | 5 | 8  | 8  | 4 | 4  | E | 7108.7908 | -0.0019 |
| 8  | 5 | 8  | 8  | 4 | 5  | A | 7126.1615 | -0.0119 |
| 8  | 5 | 8  | 8  | 4 | 5  | E | 7126.1123 | -0.0001 |
| 8  | 5 | 8  | 8  | 4 | 5  | A | 7126.7019 | 0.0194  |
| 8  | 5 | 8  | 8  | 4 | 5  | E | 7126.7491 | 0.0012  |
| 9  | 0 | 8  | 8  | 1 | 7  | A | 7126.8938 | 0.0161  |
| 9  | 0 | 8  | 8  | 1 | 7  | E | 7126.8938 | 0.0117  |
| 7  | 5 | 7  | 7  | 4 | 3  | A | 7138.8732 | -0.0009 |
| 7  | 5 | 7  | 7  | 4 | 3  | E | 7138.7288 | -0.0020 |
| 7  | 5 | 7  | 7  | 4 | 3  | A | 7138.9927 | 0.0003  |
| 7  | 5 | 7  | 7  | 4 | 3  | E | 7139.1295 | -0.0005 |
| 7  | 5 | 7  | 7  | 4 | 4  | A | 7144.9624 | 0.0042  |
| 7  | 5 | 7  | 7  | 4 | 4  | E | 7144.8244 | 0.0020  |
| 7  | 5 | 7  | 7  | 4 | 4  | A | 7145.0815 | 0.0049  |
| 7  | 5 | 7  | 7  | 4 | 4  | E | 7145.2249 | 0.0033  |

|    |   |    |    |   |    |   |           |         |
|----|---|----|----|---|----|---|-----------|---------|
| 10 | 3 | 9  | 9  | 4 | 5  | A | 7148.0324 | 0.0008  |
| 10 | 3 | 9  | 9  | 4 | 5  | E | 7148.0324 | 0.0053  |
| 6  | 5 | 6  | 6  | 4 | 2  | A | 7157.3575 | 0.0341  |
| 6  | 5 | 6  | 6  | 4 | 2  | E | 7157.1326 | 0.0034  |
| 6  | 5 | 6  | 6  | 4 | 2  | A | 7157.3575 | 0.0143  |
| 6  | 5 | 6  | 6  | 4 | 2  | E | 7157.5195 | 0.0079  |
| 6  | 5 | 6  | 6  | 4 | 3  | A | 7158.9927 | -0.0081 |
| 6  | 5 | 6  | 6  | 4 | 3  | E | 7158.8261 | -0.0080 |
| 6  | 5 | 6  | 6  | 4 | 3  | A | 7158.9927 | -0.0279 |
| 6  | 5 | 6  | 6  | 4 | 3  | E | 7159.2081 | -0.0084 |
| 5  | 5 | 5  | 5  | 4 | 1  | A | 7168.1140 | -0.0037 |
| 5  | 5 | 5  | 5  | 4 | 1  | E | 7167.8571 | -0.0123 |
| 5  | 5 | 5  | 5  | 4 | 1  | A | 7168.1140 | -0.0055 |
| 5  | 5 | 5  | 5  | 4 | 1  | E | 7168.2463 | -0.0054 |
| 5  | 5 | 5  | 5  | 4 | 2  | A | 7168.4493 | -0.0062 |
| 5  | 5 | 5  | 5  | 4 | 2  | E | 7168.3238 | -0.0010 |
| 5  | 5 | 5  | 5  | 4 | 2  | A | 7168.4493 | -0.0080 |
| 5  | 5 | 5  | 5  | 4 | 2  | E | 7168.6997 | -0.0074 |
| 4  | 2 | 3  | 3  | 1 | 2  | A | 7170.3317 | -0.0016 |
| 4  | 2 | 3  | 3  | 1 | 2  | E | 7170.3317 | -0.0008 |
| 9  | 2 | 9  | 9  | 1 | 9  | A | 7182.8827 | -0.0137 |
| 9  | 2 | 9  | 9  | 1 | 9  | E | 7182.8827 | 0.0028  |
| 15 | 5 | 15 | 15 | 4 | 12 | A | 7186.8927 | -0.0002 |
| 15 | 5 | 15 | 15 | 4 | 12 | E | 7186.8927 | 0.0013  |
| 10 | 3 | 9  | 9  | 4 | 6  | A | 7193.5801 | -0.0112 |
| 10 | 3 | 9  | 9  | 4 | 6  | E | 7193.5801 | -0.0072 |
| 10 | 2 | 9  | 9  | 3 | 6  | A | 7200.5676 | -0.0015 |
| 10 | 2 | 9  | 9  | 3 | 6  | E | 7200.5676 | -0.0051 |
| 13 | 2 | 13 | 13 | 1 | 13 | A | 7211.3235 | -0.0136 |
| 13 | 2 | 13 | 13 | 1 | 13 | E | 7211.2813 | -0.0085 |
| 8  | 2 | 7  | 7  | 3 | 4  | A | 7216.1222 | -0.0008 |
| 8  | 2 | 7  | 7  | 3 | 4  | E | 7216.1222 | 0.0065  |
| 6  | 1 | 5  | 5  | 1 | 5  | A | 7254.1603 | 0.0070  |
| 6  | 1 | 5  | 5  | 1 | 5  | E | 7254.1603 | 0.0085  |
| 11 | 4 | 10 | 10 | 5 | 6  | A | 7297.3482 | 0.0140  |
| 11 | 4 | 10 | 10 | 5 | 6  | E | 7297.3482 | 0.0158  |
| 16 | 5 | 16 | 16 | 4 | 13 | A | 7318.1448 | 0.0207  |
| 16 | 5 | 16 | 16 | 4 | 13 | E | 7318.1021 | -0.0192 |
| 4  | 2 | 3  | 3  | 1 | 2  | A | 7329.5141 | -0.0028 |
| 4  | 2 | 3  | 3  | 1 | 2  | E | 7329.5141 | -0.0012 |
| 6  | 0 | 5  | 5  | 0 | 5  | A | 7348.5508 | 0.0049  |
| 6  | 0 | 5  | 5  | 0 | 5  | E | 7348.5508 | 0.0064  |

**Table S11:** Line list for the fit obtained using the XIAM program for *trans*-out-perp conformer, measured rotational transitions are shown as Obs. and the residuals are shown as Diff.

| J' | K' <sub>a</sub> | K' <sub>c</sub> | J'' | K'' <sub>a</sub> | K'' <sub>c</sub> | Symm. | Obs./MHz  | Diff./MHz |
|----|-----------------|-----------------|-----|------------------|------------------|-------|-----------|-----------|
| 4  | 1               | 3               | 3   | 2                | 1                | A     | 2071.8751 | 0.0007    |
| 4  | 1               | 3               | 3   | 2                | 1                | E     | 2071.8751 | 0.0012    |
| 7  | 1               | 6               | 7   | 0                | 7                | A     | 2188.8734 | 0.0001    |
| 7  | 1               | 6               | 7   | 0                | 7                | E     | 2188.8734 | 0.0025    |
| 1  | 1               | 1               | 0   | 0                | 0                | A     | 2189.3643 | -0.0037   |
| 1  | 1               | 1               | 0   | 0                | 0                | E     | 2189.3643 | 0.0011    |
| 7  | 2               | 6               | 7   | 1                | 6                | A     | 2191.6419 | -0.0050   |
| 7  | 2               | 6               | 7   | 1                | 6                | E     | 2191.6419 | 0.0074    |
| 1  | 1               | 0               | 0   | 0                | 0                | A     | 2254.2047 | -0.0037   |
| 1  | 1               | 0               | 0   | 0                | 0                | E     | 2254.2047 | -0.0005   |
| 6  | 2               | 4               | 5   | 3                | 2                | A     | 2313.0946 | -0.0007   |
| 6  | 2               | 4               | 5   | 3                | 2                | E     | 2312.9581 | -0.0023   |
| 6  | 2               | 5               | 6   | 1                | 5                | A     | 2395.9423 | -0.0080   |
| 6  | 2               | 5               | 6   | 1                | 5                | E     | 2395.9423 | 0.0049    |
| 5  | 1               | 5               | 4   | 2                | 2                | A     | 2426.5207 | 0.0101    |
| 5  | 1               | 5               | 4   | 2                | 2                | E     | 2426.5207 | 0.0032    |
| 3  | 0               | 3               | 2   | 1                | 1                | A     | 2486.6213 | 0.0004    |
| 3  | 0               | 3               | 2   | 1                | 1                | E     | 2486.6213 | -0.0030   |
| 8  | 2               | 6               | 8   | 1                | 7                | A     | 2545.3357 | -0.0128   |
| 8  | 2               | 6               | 8   | 1                | 7                | E     | 2545.3357 | -0.0035   |
| 7  | 2               | 5               | 7   | 1                | 6                | A     | 2552.9781 | -0.0065   |
| 7  | 2               | 5               | 7   | 1                | 6                | E     | 2552.9781 | 0.0035    |
| 5  | 2               | 4               | 5   | 1                | 4                | A     | 2576.9349 | -0.0054   |
| 5  | 2               | 4               | 5   | 1                | 4                | E     | 2576.9349 | 0.0084    |
| 8  | 1               | 7               | 8   | 0                | 8                | A     | 2590.6758 | -0.0014   |
| 8  | 1               | 7               | 8   | 0                | 8                | E     | 2590.6758 | 0.0005    |
| 9  | 2               | 7               | 9   | 1                | 8                | A     | 2591.6249 | -0.0025   |
| 9  | 2               | 7               | 9   | 1                | 8                | E     | 2591.6249 | 0.0059    |
| 6  | 2               | 4               | 6   | 1                | 5                | A     | 2603.2423 | -0.0163   |
| 6  | 2               | 4               | 6   | 1                | 5                | E     | 2603.2423 | -0.0060   |
| 8  | 3               | 5               | 7   | 4                | 3                | A     | 2611.6245 | -0.0005   |
| 8  | 3               | 5               | 7   | 4                | 3                | E     | 2610.9583 | -0.0018   |
| 3  | 0               | 3               | 2   | 1                | 2                | A     | 2681.1446 | 0.0024    |
| 3  | 0               | 3               | 2   | 1                | 2                | E     | 2681.1446 | -0.0016   |
| 5  | 2               | 3               | 5   | 1                | 4                | A     | 2682.8870 | -0.0085   |
| 5  | 2               | 3               | 5   | 1                | 4                | E     | 2682.8870 | 0.0013    |
| 10 | 2               | 8               | 10  | 1                | 9                | A     | 2701.0841 | -0.0026   |
| 10 | 2               | 8               | 10  | 1                | 9                | E     | 2701.0841 | 0.0046    |
| 4  | 2               | 3               | 4   | 1                | 3                | A     | 2731.3826 | 0.0127    |
| 4  | 2               | 3               | 4   | 1                | 3                | E     | 2731.3441 | -0.0097   |
| 4  | 2               | 2               | 4   | 1                | 3                | A     | 2777.3848 | -0.0070   |
| 4  | 2               | 2               | 4   | 1                | 3                | E     | 2777.3848 | 0.0007    |
| 3  | 2               | 2               | 3   | 1                | 2                | A     | 2856.9783 | -0.0016   |
| 3  | 2               | 2               | 3   | 1                | 2                | E     | 2856.9481 | -0.0075   |
| 3  | 2               | 1               | 3   | 1                | 2                | A     | 2872.4367 | 0.0071    |
| 3  | 2               | 1               | 3   | 1                | 2                | E     | 2872.4367 | 0.0068    |
| 11 | 2               | 9               | 11  | 1                | 10               | A     | 2881.2324 | -0.0030   |
| 11 | 2               | 9               | 11  | 1                | 10               | E     | 2881.2324 | 0.0027    |
| 9  | 1               | 8               | 9   | 0                | 9                | A     | 3055.7852 | 0.0026    |
| 9  | 1               | 8               | 9   | 0                | 9                | E     | 3055.7852 | 0.0041    |
| 12 | 2               | 10              | 12  | 1                | 11               | A     | 3137.7103 | -0.0011   |
| 12 | 2               | 10              | 12  | 1                | 11               | E     | 3137.7103 | 0.0031    |
| 3  | 2               | 2               | 3   | 1                | 3                | A     | 3245.9401 | 0.0110    |
| 3  | 2               | 2               | 3   | 1                | 3                | E     | 3245.8977 | -0.0075   |
| 3  | 2               | 1               | 3   | 1                | 3                | A     | 3261.3803 | 0.0016    |
| 3  | 2               | 1               | 3   | 1                | 3                | E     | 3261.3803 | 0.0008    |
| 7  | 2               | 6               | 6   | 3                | 3                | A     | 3267.3308 | -0.0182   |
| 7  | 2               | 6               | 6   | 3                | 3                | E     | 3267.3308 | 0.0181    |
| 7  | 2               | 6               | 6   | 3                | 4                | A     | 3275.0742 | 0.0018    |
| 7  | 2               | 6               | 6   | 3                | 4                | E     | 3275.1454 | -0.0002   |
| 2  | 1               | 2               | 1   | 0                | 1                | A     | 3329.8025 | -0.0042   |
| 2  | 1               | 2               | 1   | 0                | 1                | E     | 3329.8025 | 0.0001    |
| 6  | 1               | 6               | 5   | 2                | 3                | A     | 3361.8998 | 0.0077    |
| 6  | 1               | 6               | 5   | 2                | 3                | E     | 3361.8998 | -0.0012   |
| 4  | 2               | 3               | 4   | 1                | 4                | A     | 3379.1037 | -0.0198   |
| 4  | 2               | 3               | 4   | 1                | 4                | E     | 3379.1037 | -0.0040   |
| 5  | 1               | 4               | 4   | 2                | 2                | A     | 3396.5301 | 0.0058    |
| 5  | 1               | 4               | 4   | 2                | 2                | E     | 3396.5301 | -0.0017   |
| 4  | 2               | 2               | 4   | 1                | 4                | A     | 3425.1368 | -0.0086   |
| 4  | 2               | 2               | 4   | 1                | 4                | E     | 3425.1368 | -0.0013   |
| 5  | 1               | 4               | 4   | 2                | 3                | A     | 3442.5354 | -0.0109   |
| 5  | 1               | 4               | 4   | 2                | 3                | E     | 3442.5678 | 0.0056    |
| 13 | 2               | 11              | 13  | 1                | 12               | A     | 3473.5233 | -0.0022   |

|    |   |    |    |   |    |   |           |         |
|----|---|----|----|---|----|---|-----------|---------|
| 13 | 2 | 11 | 13 | 1 | 12 | E | 3473.5233 | 0.0003  |
| 2  | 1 | 1  | 1  | 0 | 1  | A | 3524.3183 | -0.0096 |
| 2  | 1 | 1  | 1  | 0 | 1  | E | 3524.3183 | -0.0059 |
| 5  | 2 | 4  | 5  | 1 | 5  | A | 3546.9571 | 0.0030  |
| 5  | 2 | 4  | 5  | 1 | 5  | E | 3546.9571 | 0.0163  |
| 4  | 0 | 4  | 3  | 1 | 2  | A | 3566.0319 | -0.0108 |
| 4  | 0 | 4  | 3  | 1 | 2  | E | 3566.0319 | -0.0141 |
| 10 | 1 | 9  | 10 | 0 | 10 | A | 3575.5153 | -0.0017 |
| 10 | 1 | 9  | 10 | 0 | 10 | E | 3575.5153 | -0.0005 |
| 7  | 2 | 5  | 6  | 3 | 3  | A | 3628.6744 | -0.0123 |
| 7  | 2 | 5  | 6  | 3 | 3  | E | 3628.6744 | 0.0215  |
| 7  | 2 | 5  | 6  | 3 | 4  | A | 3636.4062 | -0.0038 |
| 7  | 2 | 5  | 6  | 3 | 4  | E | 3636.4615 | -0.0244 |
| 5  | 2 | 3  | 5  | 1 | 5  | A | 3652.9008 | -0.0084 |
| 5  | 2 | 3  | 5  | 1 | 5  | E | 3652.9008 | 0.0009  |
| 6  | 2 | 5  | 6  | 1 | 6  | A | 3749.8563 | -0.0048 |
| 6  | 2 | 5  | 6  | 1 | 6  | E | 3749.8563 | 0.0075  |
| 9  | 3 | 7  | 8  | 4 | 5  | A | 3786.5611 | -0.0051 |
| 9  | 3 | 7  | 8  | 4 | 5  | E | 3787.0653 | 0.0040  |
| 14 | 2 | 12 | 14 | 1 | 13 | A | 3887.9492 | 0.0022  |
| 14 | 2 | 12 | 14 | 1 | 13 | E | 3887.9492 | 0.0031  |
| 4  | 0 | 4  | 3  | 1 | 3  | A | 3954.9941 | 0.0023  |
| 4  | 0 | 4  | 3  | 1 | 3  | E | 3954.9941 | -0.0015 |
| 6  | 2 | 4  | 6  | 1 | 6  | A | 3957.1642 | -0.0052 |
| 6  | 2 | 4  | 6  | 1 | 6  | E | 3957.1642 | 0.0044  |
| 7  | 2 | 6  | 7  | 1 | 7  | A | 3987.9834 | 0.0075  |
| 7  | 2 | 6  | 7  | 1 | 7  | E | 3987.9834 | 0.0193  |
| 11 | 1 | 10 | 11 | 0 | 11 | A | 4137.6497 | 0.0014  |
| 11 | 1 | 10 | 11 | 0 | 11 | E | 4137.6497 | 0.0025  |
| 7  | 1 | 7  | 6  | 2 | 4  | A | 4217.5961 | 0.0056  |
| 7  | 1 | 7  | 6  | 2 | 4  | E | 4217.5961 | -0.0035 |
| 8  | 2 | 7  | 8  | 1 | 8  | A | 4260.9571 | -0.0227 |
| 8  | 2 | 7  | 8  | 1 | 8  | E | 4260.9571 | -0.0112 |
| 7  | 2 | 5  | 7  | 1 | 7  | A | 4349.3035 | -0.0101 |
| 7  | 2 | 5  | 7  | 1 | 7  | E | 4349.3035 | -0.0008 |
| 15 | 2 | 13 | 15 | 1 | 14 | A | 4375.6485 | -0.0022 |
| 15 | 2 | 13 | 15 | 1 | 14 | E | 4375.6485 | -0.0028 |
| 8  | 2 | 7  | 7  | 3 | 4  | A | 4403.3025 | -0.0081 |
| 8  | 2 | 7  | 7  | 3 | 4  | E | 4403.3025 | -0.0043 |
| 8  | 2 | 7  | 7  | 3 | 5  | A | 4422.5033 | 0.0193  |
| 8  | 2 | 7  | 7  | 3 | 5  | E | 4422.5033 | -0.0212 |
| 7  | 1 | 7  | 6  | 2 | 5  | A | 4424.9048 | 0.0059  |
| 7  | 1 | 7  | 6  | 2 | 5  | E | 4424.9048 | -0.0058 |
| 3  | 1 | 3  | 2  | 0 | 2  | A | 4439.0266 | -0.0022 |
| 3  | 1 | 3  | 2  | 0 | 2  | E | 4439.0266 | 0.0020  |
| 9  | 3 | 7  | 9  | 2 | 7  | A | 4474.4467 | 0.0024  |
| 9  | 3 | 7  | 9  | 2 | 7  | E | 4474.4129 | -0.0043 |
| 9  | 3 | 6  | 9  | 2 | 7  | A | 4556.6297 | 0.0067  |
| 9  | 3 | 6  | 9  | 2 | 7  | E | 4556.6297 | 0.0229  |
| 9  | 2 | 8  | 9  | 1 | 9  | A | 4568.0003 | 0.0023  |
| 9  | 2 | 8  | 9  | 1 | 9  | E | 4568.0003 | 0.0136  |
| 5  | 0 | 5  | 4  | 1 | 3  | A | 4588.1479 | -0.0114 |
| 5  | 0 | 5  | 4  | 1 | 3  | E | 4588.1479 | -0.0145 |
| 8  | 3 | 6  | 8  | 2 | 6  | A | 4669.2083 | 0.0007  |
| 8  | 3 | 6  | 8  | 2 | 6  | E | 4669.1739 | -0.0021 |
| 8  | 3 | 5  | 8  | 2 | 6  | A | 4710.9369 | -0.0043 |
| 8  | 3 | 5  | 8  | 2 | 6  | E | 4710.9369 | 0.0068  |
| 6  | 1 | 5  | 5  | 2 | 3  | A | 4715.8101 | 0.0072  |
| 6  | 1 | 5  | 5  | 2 | 3  | E | 4715.8101 | -0.0023 |
| 12 | 1 | 11 | 12 | 0 | 12 | A | 4728.2047 | -0.0048 |
| 12 | 1 | 11 | 12 | 0 | 12 | E | 4728.2047 | -0.0036 |
| 7  | 3 | 5  | 7  | 2 | 5  | A | 4820.7068 | -0.0050 |
| 7  | 3 | 5  | 7  | 2 | 5  | E | 4820.6711 | 0.0026  |
| 6  | 1 | 5  | 5  | 2 | 4  | A | 4821.7642 | 0.0061  |
| 6  | 1 | 5  | 5  | 2 | 4  | E | 4821.7642 | -0.0074 |
| 3  | 1 | 2  | 2  | 0 | 2  | A | 4827.9753 | -0.0027 |
| 3  | 1 | 2  | 2  | 0 | 2  | E | 4827.9753 | 0.0012  |
| 8  | 2 | 6  | 8  | 1 | 8  | A | 4837.8065 | -0.0047 |
| 8  | 2 | 6  | 8  | 1 | 8  | E | 4837.8065 | 0.0040  |
| 7  | 3 | 4  | 7  | 2 | 5  | A | 4839.8793 | -0.0059 |
| 7  | 3 | 4  | 7  | 2 | 5  | E | 4839.8793 | -0.0069 |
| 10 | 2 | 9  | 10 | 1 | 10 | A | 4907.5373 | -0.0108 |
| 10 | 2 | 9  | 10 | 1 | 10 | E | 4907.5373 | 0.0004  |
| 6  | 3 | 4  | 6  | 2 | 4  | A | 4930.4939 | -0.0001 |
| 6  | 3 | 4  | 6  | 2 | 4  | E | 4930.4242 | 0.0062  |
| 6  | 3 | 3  | 6  | 2 | 4  | A | 4938.2396 | 0.0221  |
| 6  | 3 | 3  | 6  | 2 | 4  | E | 4938.2396 | -0.0114 |

|    |   |    |    |   |    |   |           |         |
|----|---|----|----|---|----|---|-----------|---------|
| 8  | 2 | 6  | 7  | 3 | 4  | A | 4980.1406 | -0.0014 |
| 8  | 2 | 6  | 7  | 3 | 4  | E | 4980.1406 | -0.0004 |
| 8  | 1 | 8  | 7  | 2 | 5  | A | 4982.2260 | 0.0100  |
| 8  | 1 | 8  | 7  | 2 | 5  | E | 4982.2576 | 0.0330  |
| 8  | 2 | 6  | 7  | 3 | 5  | E | 4999.3526 | -0.0062 |
| 10 | 3 | 8  | 9  | 4 | 6  | A | 5000.6541 | 0.0060  |
| 10 | 3 | 8  | 9  | 4 | 6  | E | 5000.9189 | 0.0073  |
| 5  | 3 | 3  | 5  | 2 | 3  | A | 5003.3852 | 0.0047  |
| 5  | 3 | 3  | 5  | 2 | 3  | E | 5003.2101 | 0.0074  |
| 5  | 3 | 2  | 5  | 2 | 3  | A | 5005.9664 | 0.0002  |
| 5  | 3 | 2  | 5  | 2 | 3  | E | 5006.1019 | 0.0017  |
| 4  | 3 | 2  | 4  | 2 | 2  | A | 5046.7375 | 0.0088  |
| 4  | 3 | 2  | 4  | 2 | 2  | E | 5046.2979 | -0.0006 |
| 4  | 3 | 1  | 4  | 2 | 2  | A | 5047.3750 | -0.0017 |
| 4  | 3 | 1  | 4  | 2 | 2  | E | 5047.7614 | 0.0024  |
| 3  | 3 | 1  | 3  | 2 | 1  | A | 5068.9635 | -0.0056 |
| 3  | 3 | 1  | 3  | 2 | 1  | E | 5068.3273 | 0.0003  |
| 3  | 3 | 0  | 3  | 2 | 1  | A | 5069.0620 | 0.0002  |
| 3  | 3 | 0  | 3  | 2 | 1  | E | 5069.6434 | 0.0036  |
| 3  | 3 | 1  | 3  | 2 | 2  | A | 5084.4143 | -0.0045 |
| 3  | 3 | 1  | 3  | 2 | 2  | E | 5083.8031 | 0.0018  |
| 3  | 3 | 0  | 3  | 2 | 2  | A | 5084.5110 | -0.0004 |
| 3  | 3 | 0  | 3  | 2 | 2  | E | 5085.1161 | 0.0020  |
| 4  | 3 | 2  | 4  | 2 | 3  | A | 5092.7476 | -0.0031 |
| 4  | 3 | 2  | 4  | 2 | 3  | E | 5092.3268 | -0.0021 |
| 4  | 3 | 1  | 4  | 2 | 3  | A | 5093.3988 | 0.0001  |
| 4  | 3 | 1  | 4  | 2 | 3  | E | 5093.7923 | 0.0030  |
| 5  | 3 | 3  | 5  | 2 | 4  | A | 5109.3356 | 0.0000  |
| 5  | 3 | 3  | 5  | 2 | 4  | E | 5109.1612 | -0.0007 |
| 5  | 3 | 2  | 5  | 2 | 4  | A | 5111.9226 | 0.0012  |
| 5  | 3 | 2  | 5  | 2 | 4  | E | 5112.0612 | 0.0018  |
| 6  | 3 | 4  | 6  | 2 | 5  | A | 5137.8002 | -0.0022 |
| 6  | 3 | 4  | 6  | 2 | 5  | E | 5137.7271 | -0.0019 |
| 6  | 3 | 3  | 6  | 2 | 5  | A | 5145.5317 | 0.0059  |
| 6  | 3 | 3  | 6  | 2 | 5  | E | 5145.5640 | 0.0020  |
| 7  | 3 | 5  | 7  | 2 | 6  | A | 5182.0238 | -0.0257 |
| 7  | 3 | 5  | 7  | 2 | 6  | E | 5182.0238 | 0.0152  |
| 7  | 3 | 4  | 7  | 2 | 6  | A | 5201.2230 | 0.0000  |
| 7  | 3 | 4  | 7  | 2 | 6  | E | 5201.2230 | -0.0034 |
| 5  | 0 | 5  | 4  | 1 | 4  | A | 5235.9150 | 0.0022  |
| 5  | 0 | 5  | 4  | 1 | 4  | E | 5235.9150 | -0.0013 |
| 8  | 3 | 6  | 8  | 2 | 7  | A | 5246.0400 | 0.0010  |
| 8  | 3 | 6  | 8  | 2 | 7  | E | 5246.0082 | -0.0019 |
| 11 | 2 | 10 | 11 | 1 | 11 | A | 5277.5525 | -0.0011 |
| 11 | 2 | 10 | 11 | 1 | 11 | E | 5277.5525 | 0.0102  |
| 8  | 3 | 5  | 8  | 2 | 7  | A | 5287.7711 | -0.0015 |
| 8  | 3 | 5  | 8  | 2 | 7  | E | 5287.7711 | 0.0068  |
| 8  | 1 | 8  | 7  | 2 | 6  | A | 5343.5604 | 0.0068  |
| 8  | 1 | 8  | 7  | 2 | 6  | E | 5343.5604 | -0.0044 |
| 9  | 3 | 6  | 9  | 2 | 8  | A | 5415.7683 | -0.0029 |
| 9  | 3 | 6  | 9  | 2 | 8  | E | 5415.7683 | 0.0099  |
| 9  | 2 | 7  | 9  | 1 | 9  | A | 5427.1469 | 0.0007  |
| 9  | 2 | 7  | 9  | 1 | 9  | E | 5427.1469 | 0.0085  |
| 2  | 2 | 1  | 1  | 1 | 0  | A | 5427.6615 | 0.0027  |
| 2  | 2 | 1  | 1  | 1 | 0  | E | 5427.5887 | 0.0028  |
| 2  | 2 | 0  | 1  | 1 | 0  | A | 5430.7645 | 0.0064  |
| 2  | 2 | 0  | 1  | 1 | 0  | E | 5430.8079 | 0.0022  |
| 10 | 3 | 8  | 10 | 2 | 9  | A | 5448.2114 | 0.0078  |
| 10 | 3 | 8  | 10 | 2 | 9  | E | 5448.1626 | -0.0201 |
| 2  | 2 | 1  | 1  | 1 | 1  | A | 5492.5072 | 0.0079  |
| 2  | 2 | 1  | 1  | 1 | 1  | E | 5492.4313 | 0.0035  |
| 9  | 2 | 8  | 8  | 3 | 5  | A | 5504.5055 | -0.0039 |
| 9  | 2 | 8  | 8  | 3 | 5  | E | 5504.5055 | -0.0116 |
| 4  | 1 | 4  | 3  | 0 | 3  | A | 5521.0384 | -0.0030 |
| 4  | 1 | 4  | 3  | 0 | 3  | E | 5521.0384 | 0.0013  |
| 6  | 0 | 6  | 5  | 1 | 4  | A | 5544.4442 | 0.0094  |
| 6  | 0 | 6  | 5  | 1 | 4  | E | 5544.4442 | 0.0068  |
| 11 | 3 | 9  | 11 | 2 | 10 | A | 5592.8853 | 0.0096  |
| 11 | 3 | 9  | 11 | 2 | 10 | E | 5592.8421 | -0.0144 |
| 10 | 3 | 7  | 10 | 2 | 9  | A | 5597.5171 | 0.0018  |
| 10 | 3 | 7  | 10 | 2 | 9  | E | 5597.5171 | 0.0159  |
| 14 | 1 | 13 | 14 | 0 | 14 | A | 5942.0081 | -0.0001 |
| 14 | 1 | 13 | 14 | 0 | 14 | E | 5942.0081 | 0.0014  |
| 13 | 3 | 11 | 13 | 2 | 12 | A | 5981.1866 | -0.0152 |
| 13 | 3 | 11 | 13 | 2 | 12 | E | 5981.1866 | 0.0019  |
| 15 | 4 | 12 | 15 | 3 | 12 | A | 6010.2819 | -0.0145 |
| 15 | 4 | 12 | 15 | 3 | 12 | E | 6010.2819 | 0.0239  |

|    |   |    |    |   |    |   |           |         |
|----|---|----|----|---|----|---|-----------|---------|
| 7  | 1 | 6  | 6  | 2 | 4  | A | 6013.9210 | 0.0015  |
| 7  | 1 | 6  | 6  | 2 | 4  | E | 6013.9210 | -0.0082 |
| 10 | 2 | 8  | 10 | 1 | 10 | A | 6117.7449 | 0.0062  |
| 10 | 2 | 8  | 10 | 1 | 10 | E | 6117.7449 | 0.0133  |
| 4  | 1 | 3  | 3  | 0 | 3  | A | 6168.7965 | 0.0016  |
| 4  | 1 | 3  | 3  | 0 | 3  | E | 6168.7965 | 0.0055  |
| 7  | 1 | 6  | 6  | 2 | 5  | A | 6221.2409 | 0.0131  |
| 7  | 1 | 6  | 6  | 2 | 5  | E | 6221.2409 | 0.0007  |
| 9  | 2 | 7  | 8  | 3 | 5  | A | 6363.6659 | 0.0084  |
| 9  | 2 | 7  | 8  | 3 | 5  | E | 6363.6659 | -0.0028 |
| 7  | 0 | 7  | 6  | 1 | 5  | A | 6428.3088 | 0.0041  |
| 7  | 0 | 7  | 6  | 1 | 5  | E | 6428.3088 | 0.0021  |
| 6  | 0 | 6  | 5  | 1 | 5  | A | 6514.4494 | 0.0008  |
| 6  | 0 | 6  | 5  | 1 | 5  | E | 6514.4494 | -0.0023 |
| 13 | 4 | 10 | 13 | 3 | 10 | A | 6524.9225 | -0.0164 |
| 3  | 2 | 2  | 2  | 1 | 1  | A | 6568.1113 | 0.0195  |
| 3  | 2 | 2  | 2  | 1 | 1  | E | 6568.0708 | 0.0036  |
| 5  | 1 | 5  | 4  | 0 | 4  | A | 6582.1601 | -0.0035 |
| 5  | 1 | 5  | 4  | 0 | 4  | E | 6582.1601 | 0.0008  |
| 3  | 2 | 1  | 2  | 1 | 1  | A | 6583.5437 | 0.0022  |
| 3  | 2 | 1  | 2  | 1 | 1  | E | 6583.5437 | 0.0021  |
| 12 | 4 | 8  | 12 | 3 | 9  | A | 6734.9709 | -0.0028 |
| 12 | 4 | 8  | 12 | 3 | 9  | E | 6734.9709 | 0.0020  |
| 3  | 2 | 2  | 2  | 1 | 2  | A | 6762.6243 | 0.0112  |
| 3  | 2 | 2  | 2  | 1 | 2  | E | 6762.5787 | -0.0104 |
| 3  | 2 | 1  | 2  | 1 | 2  | A | 6778.0634 | 0.0007  |
| 3  | 2 | 1  | 2  | 1 | 2  | E | 6778.0634 | 0.0000  |
| 11 | 4 | 8  | 11 | 3 | 8  | A | 6842.8511 | -0.0020 |
| 11 | 4 | 8  | 11 | 3 | 8  | E | 6842.7649 | -0.0055 |
| 10 | 4 | 7  | 10 | 3 | 7  | A | 6940.5671 | 0.0096  |
| 10 | 4 | 7  | 10 | 3 | 7  | E | 6940.4262 | 0.0094  |
| 10 | 4 | 6  | 10 | 3 | 7  | A | 6947.3117 | -0.0112 |
| 10 | 4 | 6  | 10 | 3 | 7  | E | 6947.3972 | -0.0036 |
| 9  | 4 | 6  | 9  | 3 | 6  | A | 7007.5635 | -0.0075 |
| 9  | 4 | 6  | 9  | 3 | 6  | E | 7007.2902 | -0.0086 |
| 9  | 4 | 5  | 9  | 3 | 6  | A | 7010.4845 | -0.0062 |
| 9  | 4 | 5  | 9  | 3 | 6  | E | 7010.6939 | -0.0024 |
| 8  | 4 | 5  | 8  | 3 | 5  | A | 7051.5358 | 0.0003  |
| 8  | 4 | 5  | 8  | 3 | 5  | E | 7051.0223 | -0.0023 |
| 8  | 4 | 4  | 8  | 3 | 5  | A | 7052.6640 | -0.0001 |
| 8  | 4 | 4  | 8  | 3 | 5  | E | 7053.0990 | 0.0001  |
| 10 | 1 | 10 | 9  | 2 | 8  | A | 7068.2427 | 0.0039  |
| 10 | 1 | 10 | 9  | 2 | 8  | E | 7068.2427 | -0.0066 |
| 7  | 4 | 4  | 7  | 3 | 4  | A | 7079.0777 | -0.0029 |
| 7  | 4 | 4  | 7  | 3 | 4  | E | 7078.3318 | 0.0037  |
| 7  | 4 | 3  | 7  | 3 | 4  | A | 7079.4728 | 0.0146  |
| 7  | 4 | 3  | 7  | 3 | 4  | E | 7080.1098 | -0.0012 |
| 9  | 4 | 5  | 9  | 3 | 7  | A | 7092.6711 | 0.0015  |
| 9  | 4 | 5  | 9  | 3 | 7  | E | 7092.8936 | 0.0077  |
| 8  | 4 | 5  | 8  | 3 | 6  | A | 7093.2713 | 0.0022  |
| 8  | 4 | 5  | 8  | 3 | 6  | E | 7092.7883 | 0.0096  |
| 8  | 4 | 4  | 8  | 3 | 6  | A | 7094.3979 | 0.0002  |
| 8  | 4 | 4  | 8  | 3 | 6  | E | 7094.8555 | 0.0025  |
| 6  | 4 | 3  | 6  | 3 | 3  | A | 7095.4898 | 0.0025  |
| 6  | 4 | 3  | 6  | 3 | 3  | E | 7094.5852 | 0.0021  |
| 6  | 4 | 2  | 6  | 3 | 3  | A | 7095.5898 | -0.0007 |
| 6  | 4 | 2  | 6  | 3 | 3  | E | 7096.3320 | 0.0021  |
| 11 | 4 | 8  | 11 | 3 | 9  | A | 7096.4505 | -0.0091 |
| 10 | 4 | 6  | 10 | 3 | 8  | A | 7096.6210 | -0.0138 |
| 10 | 4 | 6  | 10 | 3 | 8  | E | 7096.7047 | -0.0146 |
| 7  | 4 | 4  | 7  | 3 | 5  | A | 7098.2438 | -0.0102 |
| 7  | 4 | 4  | 7  | 3 | 5  | E | 7097.5377 | -0.0081 |
| 7  | 4 | 3  | 7  | 3 | 5  | A | 7098.6335 | 0.0019  |
| 7  | 4 | 3  | 7  | 3 | 5  | E | 7099.3280 | -0.0006 |
| 6  | 4 | 3  | 6  | 3 | 4  | A | 7103.2147 | 0.0039  |
| 6  | 4 | 3  | 6  | 3 | 4  | E | 7102.4105 | -0.0055 |
| 6  | 4 | 2  | 6  | 3 | 4  | A | 7103.3138 | -0.0002 |
| 6  | 4 | 2  | 6  | 3 | 4  | E | 7104.1671 | 0.0042  |
| 5  | 4 | 1  | 5  | 3 | 2  | A | 7104.6830 | -0.0292 |
| 5  | 4 | 1  | 5  | 3 | 2  | E | 7105.3922 | 0.0015  |
| 5  | 4 | 2  | 5  | 3 | 2  | A | 7104.6830 | -0.0085 |
| 5  | 4 | 2  | 5  | 3 | 2  | E | 7103.6761 | 0.0303  |
| 5  | 4 | 1  | 5  | 3 | 3  | A | 7107.3001 | 0.0022  |
| 5  | 4 | 1  | 5  | 3 | 3  | E | 7108.2897 | 0.0014  |
| 5  | 4 | 2  | 5  | 3 | 3  | A | 7107.3001 | 0.0229  |
| 5  | 4 | 2  | 5  | 3 | 3  | E | 7106.5407 | -0.0027 |
| 4  | 4 | 0  | 4  | 3 | 1  | A | 7109.4685 | -0.0049 |

|    |   |   |    |   |    |   |           |         |
|----|---|---|----|---|----|---|-----------|---------|
| 4  | 4 | 0 | 4  | 3 | 1  | E | 7109.9086 | -0.0024 |
| 4  | 4 | 1 | 4  | 3 | 1  | A | 7109.4685 | -0.0026 |
| 4  | 4 | 1 | 4  | 3 | 1  | E | 7108.1510 | -0.0148 |
| 4  | 4 | 1 | 4  | 3 | 2  | A | 7110.1175 | -0.0017 |
| 4  | 4 | 1 | 4  | 3 | 2  | E | 7109.6216 | -0.0046 |
| 4  | 4 | 0 | 4  | 3 | 2  | A | 7110.1175 | -0.0040 |
| 12 | 4 | 8 | 12 | 3 | 10 | A | 7141.3109 | 0.0165  |
| 12 | 4 | 8 | 12 | 3 | 10 | E | 7141.3109 | 0.0162  |
| 8  | 0 | 8 | 7  | 1 | 6  | A | 7236.9878 | 0.0017  |
| 8  | 0 | 8 | 7  | 1 | 6  | E | 7236.9878 | 0.0004  |
| 8  | 1 | 7 | 7  | 2 | 5  | A | 7274.6974 | 0.0187  |
| 8  | 1 | 7 | 7  | 2 | 5  | E | 7274.6974 | 0.0093  |
| 5  | 1 | 4 | 4  | 0 | 4  | A | 7552.1723 | -0.0051 |
| 5  | 1 | 4 | 4  | 0 | 4  | E | 7552.1723 | -0.0013 |
| 6  | 1 | 6 | 5  | 0 | 5  | A | 7630.5315 | -0.0130 |
| 6  | 1 | 6 | 5  | 0 | 5  | E | 7630.5315 | -0.0087 |
| 8  | 1 | 7 | 7  | 2 | 6  | A | 7636.0275 | 0.0111  |
| 8  | 1 | 7 | 7  | 2 | 6  | E | 7636.0275 | -0.0007 |
| 4  | 2 | 3 | 3  | 1 | 2  | A | 7675.6660 | -0.0079 |
| 4  | 2 | 3 | 3  | 1 | 2  | E | 7675.6660 | 0.0085  |
| 4  | 2 | 2 | 3  | 1 | 2  | A | 7721.6859 | -0.0099 |
| 4  | 2 | 2 | 3  | 1 | 2  | E | 7721.6859 | -0.0020 |
| 10 | 2 | 8 | 9  | 3 | 6  | A | 7770.2043 | -0.0019 |
| 10 | 2 | 8 | 9  | 3 | 6  | E | 7770.2043 | -0.0181 |
| 7  | 0 | 7 | 6  | 1 | 6  | A | 7782.2122 | -0.0033 |
| 7  | 0 | 7 | 6  | 1 | 6  | E | 7782.2122 | -0.0059 |
| 9  | 0 | 9 | 8  | 1 | 7  | A | 7972.5331 | -0.0040 |
| 9  | 0 | 9 | 8  | 1 | 7  | E | 7972.5331 | -0.0046 |
